# Supplementary material for: The first chromosome-level cubozoan genome differentiates unique and common cnidarian features
Source: Research Square preprint supplement (doi:10.21203/rs.3.rs-7573227/v1), 2025-09-18
Supplement: Supplementary file 1 [file 1ded79fe3d6d195f6e12182f.xlsx]

## Sheet: Content
Supplementary Table
Supplementary Table 1	Genome and transcriptome sequencing data
Supplementary Table 2	Information of scaffolds and pseudochromosomes
Supplementary Table 3	Box jellyfish genomes statistics
Supplementary Table 4	Genomes used for comparative genomic analyses
Supplementary Table 5	KEGG pathway with gene gains identified in gene enrichment analyses
Supplementary Table 6	Cnidopsin gene annotation of Tripedalia maipoensis and Morbakka virulenta
Supplementary Table 7	Jellyfish toxin gene annotation of Tripedalia maipoensis and Morbakka virulenta
Supplementary Table 8	Neuropeptide annotation
Supplementary Table 9	Sesquiterpenoid hormone biosynthetic pathway gene annotation
Supplementary Table 10	miRNA annotation in Tripedalia maipoensis
Supplementary Table 11	miRNA annotation in Sanderia malayensis
Supplementary Table 12	miRNA annotation in Chrysaora quinquecirrha
Supplementary Table 13	miRNA annotation in Aurelia coerulea
Supplementary Table 14	miRNA annotation in Rhopilema esculentum
Supplementary Table 15	miRNA annotation in Mastigias papua

## Sheet:  1
Genomic sequencing
Species	samples	Reads	Bases	Coverage (X)	Accesion number
Tripedalia maipoensis	PacBio HiFi	2886234	31738302528	49.7624	SRR29229993
	Omni-C	339677642	50951646300	79.8869	SRR29229994
Transcriptomic sequencing
Species	Library	samples	Reads	Bases	Accesion number
Tripedalia maipoensis	mRNA	MPJelly8a01R	41217054	6182450599	SRR29229999
		MPjellymedRN	36730502	5509510908	SRR29229998
	sRNA	MPJelly8a01m	20812364	1040618200	SRR29230001
		Mpjellymedmi	25112743	1255637150	SRR29230000
Mastigia pupua		6D0	42674953	899236522	SRR35210223
		6D1	41291418	804322287	SRR35210222
		9D0	41310034	905580607	SRR35210221
		9D1	45644668	853788019	SRR35210220
Chrysaora quinquecirrha		Cqu_A	22977765	1148888250	SRR35210219
		Cqu_B	24658112	1232905600	SRR35210218
		Cqu_G	23925339	1196266950	SRR35210217
		Cqu_T	22707076	1135353800	SRR35210216

## Sheet: 2
#chr	scaffold_id	scafffold_length	Cumulative % of whole genome
1	scaffold_1	68884794	10.8004
2	scaffold_2	59641826	20.1517
3	scaffold_3	55032482	28.7802
4	scaffold_4	54273494	37.2897
5	scaffold_5	52002751	45.4432
6	scaffold_6	47058510	52.8215
7	scaffold_7	37588772	58.715
8	scaffold_8	32294232	63.7784
9	scaffold_9	30970436	68.6343
10	scaffold_10	30158993	73.3629
11	scaffold_11	24489505	77.2026
12	scaffold_12	23141929	80.831
13	scaffold_13	21497000	84.2015
14	scaffold_14	18630045	87.1225
15	scaffold_15	17419373	89.8537
16	scaffold_16	16083400	92.3754
17	scaffold_17	15317000	94.777
18	scaffold_18	12654263	96.761
N/A	scaffold_19	3188654	97.261
N/A	scaffold_20	2523572	97.6566
N/A	scaffold_21	1849916	97.9467
N/A	scaffold_22	1522117	98.1853
N/A	scaffold_23	1162857	98.3677
N/A	scaffold_24	1059678	98.5338

## Sheet: 3
##	Taxonomic ID	order	family	Accession	Organism Name	Assembly Level	BioProject	BUSCO (geno, metazoa_odb10)	total_length	number	mean_length	longest	shortest	N %	Gaps	N50	N50n	N70	N70n	N90	N90n	Prot_number	Prot_mean_length	BUSCO(Prot, metazoa_odb10)
1	686327	Carybdeida	Carukiidae	GCA_003991215.1	Morbakka virulenta	Scaffold	PRJNA494059	C:77.4%[S:77.0%,D:0.4%],F:12.6%,M:10.0%,n:954	951575644	4538	209691	14479314	503	0.118662	104806	2173999	128	1350188	236	495849	460	13029	492.83	C:74.1%[S:57.9%,D:16.2%],F:5.0%,M:20.9%,n:954
2	1193083	Carybdeida	Alatinidae	GCA_008930755.2	Alatina alata	Scaffold	PRJNA421156	C:10.9%[S:10.6%,D:0.3%],F:32.5%,M:56.6%,n:954	1308494669	2005718	652.38	21771	200	0.000539475	7059	919	359349	516	743142	274	1450687	/	/	/
3	2292721	Carybdeida	Alatinidae	GCA_010016025.2	Alatinidae sp. Z8VKAUB7J3	Scaffold	PRJNA493613	C:37.3%[S:33.0%,D:4.3%],F:37.6%,M:25.1%,n:954	1323732878	721499	1834.7	262554599	247	0.00234799	38177	38669433	4	3150	41537	461	389936	164626	253.74	C:9.2%[S:5.0%,D:4.2%],F:4.5%,M:86.3%,n:954
4	686687	Carybdeida	Carybdeidae	GCA_010016065.2	Carybdea cf. marsupialis auct. non (Linnaeus, 1758)	Scaffold	PRJNA493611	C:44.7%[S:41.5%,D:3.2%],F:37.8%,M:17.5%,n:954	1218614357	1378355	884.11	260875	200	0.000261216	8515	2268	73598	662	298270	286	898791	/	/	/
5	672230	Chirodropida	Chirodropidae	GCA_024741275.1	Chironex yamaguchii	Scaffold	PRJNA764276	C:48.6%[S:48.5%,D:0.1%],F:32.8%,M:18.6%,n:954	467325690	91572	5103.37	135941	500	0.00213864	10162	12149	11069	6964	21193	2107	44115	19433	272.46	C:42.9%[S:38.6%,D:4.3%],F:18.6%,M:38.6%,n:954
6	685043	Carybdeida	Tamoyidae	GCA_028566775.1	Tamoya ohboya	Scaffold	PRJNA676141	C:1.7%[S:1.7%,D:0.0%],F:7.3%,M:91.0%,n:954	183949938	260360	706.52	9671	500	0.000180484	332	686	100997	595	158744	528	224517	/	/	/
7	2949330	Carybdeida	Tripedaliidae	JBDZFW000000000	Tripedalia maipoensis	Chromosome	PRJNA1117645	C:82.6%[S:82.1%,D:0.5%],F:9.1%,M:8.3%,n:954	637796984	210	3.03713e+06	68884794	1000	0.000374414	1189	47058510	6	30158993	10	16083400	16	14233	572	C:90.0%[S:80.6%,D:9.4%],F:2.2%,M:7.8%,n:954

## Sheet:  4
Phylum	Subphylum	Class	Order	Taxa_ID	Scientific name	Macrosynteny analysis	Gene gain and functional enrichment analyses	Proteome tBUSCO	BioProject	Reference
Cnidaria	Medusozoa	Scyphozoa	Rhizostomeae	Resc	Rhopilema esculentum	Y	Y	C:93.9%[S:93.6%,D:0.3%],F:2.0%,M:4.1%,n:954	PRJNA505074	Nong, W., Cao, J., Li, Y., Qu, Z., Sun, J., Swale, T., ... & Hui, J. H. (2020). Jellyfish genomes reveal distinct homeobox gene clusters and conservation of small RNA processing. Nature communications, 11(1), 3051.
Cnidaria	Medusozoa	Scyphozoa	Semaeostomeae	Smal	Sanderia malayensis	Y	Y	C:89.2%[S:86.5%,D:2.7%],F:4.7%,M:6.1%,n:954	PRJNA505074	Nong, W., Cao, J., Li, Y., Qu, Z., Sun, J., Swale, T., ... & Hui, J. H. (2020). Jellyfish genomes reveal distinct homeobox gene clusters and conservation of small RNA processing. Nature communications, 11(1), 3051.
Cnidaria	Medusozoa	Cubozoa	Carybdeida	Mvir	Morbakka virulenta		Y	C:84.6%[S:84.1%,D:0.5%],F:8.5%,M:6.9%,n:954	PRJNA494059	Khalturin, K., Shinzato, C., Khalturina, M., Hamada, M., Fujie, M., Koyanagi, R., ... & Satoh, N. (2019). Medusozoan genomes inform the evolution of the jellyfish body plan. Nature ecology & evolution, 3(5), 811-822.
Cnidaria	Medusozoa	Cubozoa	Carybdeida	Tmai	Tripedalia maipoensis	Y	Y	C:89.9%[S:89.5%,D:0.4%],F:2.3%,M:7.8%,n:954	This study	This study
Cnidaria	Medusozoa	Hydrozoa	Anthoathecata	Hvul	Hydra vulgaris	Y	Y	C:94.7%[S:93.3%,D:1.4%],F:1.7%,M:3.6%,n:954	PRJNA816482	Cazet, J. F., Siebert, S., Little, H. M., Bertemes, P., Primack, A. S., Ladurner, P., ... & Juliano, C. E. (2023). A chromosome-scale epigenetic map of the Hydra genome reveals conserved regulators of cell state. Genome Research, 33(2), 283-298.
Cnidaria	Medusozoa	Hydrozoa	Anthoathecata	Hsym	Hydractinia symbiolongicarpus	Y	Y	C:93.1%[S:85.2%,D:7.9%],F:2.1%,M:4.8%,n:954	PRJNA807936	Kon-Nanjo, K., Kon, T., Horkan, H. R., Steele, R. E., Cartwright, P., Frank, U., & Simakov, O. (2023). Chromosome-level genome assembly of Hydractinia symbiolongicarpus. G3: Genes, Genomes, Genetics, 13(8), jkad107.
Cnidaria	Anthozoa	Hexacorallia	Actiniaria	Nvec	Nematostella vectensis	Y	Y	C:90.0%[S:88.6%,D:1.4%],F:2.1%,M:7.9%,n:954	PRJNA12581	Putnam, N. H., Srivastava, M., Hellsten, U., Dirks, B., Chapman, J., Salamov, A., ... & Rokhsar, D. S. (2007). Sea anemone genome reveals ancestral eumetazoan gene repertoire and genomic organization. science, 317(5834), 86-94.
Cnidaria	Anthozoa	Hexacorallia	Actiniaria	Acti	Actinernus sp.	Y	Y	C:93.1%[S:86.3%,D:6.8%],F:2.8%,M:4.1%,n:954	PRJNA889077	Law, S. T. S., Yu, Y., Nong, W., So, W. L., Li, Y., Swale, T., ... & Hui, J. H. L. (2023). The genome of the deep-sea anemone Actinernus sp. contains a mega-array of ANTP-class homeobox genes. Proceedings of the Royal Society B, 290(2009), 20231563.
Cnidaria	Anthozoa	Hexacorallia	Scleractinia	Amil	Acropora millepora	Y	Y	C:96.5%[S:90.0%,D:6.5%],F:0.8%,M:2.7%,n:954	PRJNA633778	Fuller, Z. L., Mocellin, V. J., Morris, L. A., Cantin, N., Shepherd, J., Sarre, L., ... & Przeworski, M. (2020). Population genetics of the coral Acropora millepora: Toward genomic prediction of bleaching. Science, 369(6501), eaba4674.
Cnidaria	Anthozoa	Hexacorallia	Scleractinia	Cjar	Catalaphyllia jardinei	Y	Y	C:83.0%[S:78.6%,D:4.4%],F:9.2%,M:7.8%,n:954	PRJNA687327	Yu, Y., Nong, W., So, W. L., Xie, Y., Yip, H. Y., Haimovitz, J., ... & Hui, J. H. (2022). Genome of elegance coral Catalaphyllia jardinei (Euphylliidae). Frontiers in Marine Science, 9, 991391.
Placozoa		Uniplacotomia	Trichoplacea	Tadh	Trichoplax adhaerens		Y	C:89.3%[S:88.7%,D:0.6%],F:4.6%,M:6.1%,n:954	PRJNA12874	Srivastava, M., Begovic, E., Chapman, J., Putnam, N. H., Hellsten, U., Kawashima, T., ... & Rokhsar, D. S. (2008). The Trichoplax genome and the nature of placozoans. Nature, 454(7207), 955-960.
Ctenophora		Tentaculata	Cydippida	Hcal	Hormiphora californensis	Y	Y	C:74.2%[S:72.4%,D:1.8%],F:2.8%,M:23.0%,n:954	PRJNA576068	Schultz, D. T., Francis, W. R., McBroome, J. D., Christianson, L. M., Haddock, S. H., & Green, R. E. (2021). A chromosome-scale genome assembly and karyotype of the ctenophore Hormiphora californensis. G3, 11(11), jkab302.

## Sheet: 5
KEGG map	Description	Pfam involved	p.adjust_Tmai	p.adjust_N10
ko00830	Retinol metabolism	p450,UDPGT	0.000749339
ko00140	Steroid hormone biosynthesis	p450,UDPGT	0.00136828
ko00980	Metabolism of xenobiotics by cytochrome P450	p450,UDPGT	0.00163487
ko04020	Calcium signaling pathway	7tm_1		0.00465992
ko04726	Serotonergic synapse	7tm_1	0.01819
ko04080	Neuroactive ligand-receptor interaction	7tm_1	0.0046311	7.27212e-06
ko04610	Complement and coagulation cascades	7tm_1		0.000184717
ko04974	Protein digestion and absorption	Trypsin,Astacin		0.0206862
ko04330	Notch signaling pathway	Trypsin,Astacin		0.0299122

## Sheet: 6
Species	Scaffold	Start	end	strand	Tandem Duplicate	gene_model	Expression (8-arm juvenile)	Expression (medusa adult)	sequence header	Sequence	Cnidopsin_clade	Orthology
Tripedalia maipoensis	scaffold_1	2755326	2756282	-			Y	N	Tmai|scaffold_1_2755326	MSQSCIKQENYWNCFKKMTDFTFGEETYNAIGGFLIAVSVVGGTLNALVLVFFLRLYKREKRLINILIFSTAVSDLAPSLFAYPVAGIRTIQKSPYKSVSVSCKLEGFCVHVTALSSVIHLAVMAHERFSVIKSGTSNVFSVRKQHGIIFAIWFYALAVSCLPFMGWSSYKPEGLNTSCTVHWKSSNKEDVSYSVFLMFTNFLFPLFVIAISYIRLYKYVKTNSFSKRWHDSQVNRDYWKKRIQKNRALAGMVFLLISLFMVTWTPYVVICLYKIIGMPPNISPLIETVPAILAKSFTVLNPIIYGIKHHKFRAEIKRI	1b	Tcop16
Tripedalia maipoensis	scaffold_1	13544676	13545659	+		g213.t1	Y	N	Tmai|g213.t1|scaffold_1_13544676|OG0000362	MLANAAILKAFSAILIMIVTASLIFNMIVLVTFACIKRRLTFREVLFVSIALSDLLQALLGYTVEIVTTADGYWSFGNLACQLVGFVVTFLGLVSINHLSLLALDRYMTVCHPRKTERIHKYRVNAIFFALLGWLYALLWALLPILGWSDYALESVKVRCSVNWRDESLSGKAYVTCLFIFGFITHIVTLIFCYYKIHKTLVKLSGSNPPSDDTGTSPTPRLDPRAEKTYSRMVFAMIFTFLIAWLPYAILSICATFSPTFRAPIAVELSSALLAKSSTVFNPIIYVFYYKNFRKELGRLCTDHCCGLDESDIMPTEGQEADGEPEIT	2	Tcop9
Tripedalia maipoensis	scaffold_1	18926493	18927446	+			Y	N	Tmai|scaffold_1_18926493	MAGGNCSLESDFLTEYQFLGSYIGLSALLSSILNGLVIFSLWKSINSIDICGLMLLSLSINDFLSPTFGYPMAAYASFKHKWIYGDIGCKWYGFISAFSGFGSLYHLMLLSGERFISITQPLRKEQLLSNKRTLMLISLCWCSSLFWATFPLVGWNRYTLEGLQTMCSVYWQSKDSVETSYIISILVCCFLIPQTGIIYFNVNVLLEIKSMKKKARIEQGVNSSIYRGIKSISRQQSLMVVFMVLAFNLSWLPYALTSIYTLCIQAESMSPIVTSIPAVFTKSATVLNPVVYFMFNRNYRKLFKAKVLAREVEMSHFN	1a	Tcop7
Tripedalia maipoensis	scaffold_1	23796431	23797306	-			Y	N	Tmai|scaffold_1_23796431	MSEDLYIASLSIIVACGIILNSLVIVKFLYYRSQLCYRETILLSLAVSDLSQAVIGYPIEIANFMWPGLPTNTHLCVAAGFVICWLGLTSITHLVLLSYDRYLSICKPFRAFSLHTDKRKAVKYICGGWLYSLLWAALPFTGLTNYTQEGALLCSLNWSSTSVTSKVYIFCLFLFCYLLPIAAVALMLILTRNELIKMTESSRASGVRQCSSIRLDIKAEKKNTSIVIIMIISFLVAWTPYATLSLIRVVGKEKLIRATVYEVCCLFAKSACSFNPIIYSIFCKKFRTEFLR	2	Grp2_N1
Tripedalia maipoensis	scaffold_1	23848220	23849194	-		g436.t1	Y	Y	Tmai|g436.t1|scaffold_1_23848220|OG0000362	MAVSFFPVALTLVILLSTVLNGLVVFAMVKARNKLTFRDMIHLSVAFSDMVQGILGYPLEVISVLQGKWQFGHAACAGTAFMVTWLGLVSISHLVAMAIDRCLTICKPFTAHVLHQKRIDSLYFIIPSWLYGFFWAFTPLVGWGGYANEGLARCSIDWRVTDPLGVSYIISLFVFCFVLPVAVMLLSFGAIRFELRKMRHRSKSHFGEDSESVKRDLKAEKKNNRLVAIMITAFVAAWTPYSVISLSHSIDAGLNLSNEIEQLAALFAKSSCTFNPIIYTFFYKEFRKYLRDFCAGCCPCNLNIIHPEQTSVSAPTTQAVNTANA	2	Tcop5
Tripedalia maipoensis	scaffold_1	44988496	44989446	+			Y	Y	Tmai|scaffold_1_44988496	MSTITSIIGVYLSLVCSFGLLLNGVSLLVICRYKIFKESKSMKPFLMSAIALDLTTCLFSYPLSISSSFASKWSHSDQACTFYGFANTWGAINSIFQLTGLAFERYITLTHPFQKMSMLGGRRPGIFAVALTCFSLLIALLPFTGLSSYSKEGLQISCSINWTGKSANDYIYYGVLFVVGYLIPVLVQLICNIKFIMVLKVMSHASKEKYGRRSSLAVHSDRSLRQMTFMVFVMSVVFQISWMPYALVTLLRLFEVHLSPLLETLPSVFAKASVVFNPLVYCFMSKSFRSVFARCKHPEDNNEITETSRKKEAMDNK	1a	Tcop14
Tripedalia maipoensis	scaffold_1	45825891	45826877	+	.		Y	Y	Tmai|scaffold_1_45825891	MVEQQSNITSNDTNPISQTPLDDFDPQRYYNFYTFMGSFIAGSACCSFLLNGLVIAVLIKYIRTITNTNIIVLSMSCANILIPLLGSPMSATSSLMRKWQFGNGGCTWYGFINTLSGISGIYHLTFLSFERFITIVLPLKRDTILSTRNIYIGLGVLWVAAIGVAGAPVFGWCEYIKEGVRTSCSVAWSSKENMNVFSYNLFMIFTVFLLPMIIIIYCNYRFIKEVSVMSTRARGLQGGDSEMTASASKAEKQLTIMVIIMIIAYNIAWLPYTVVSMVFLTGFGEVVGPIGSSVPSVFAKTSVIYNPVIYCLLNRSFRKMLCGNSVEPE	1a	Tcop18
Tripedalia maipoensis	scaffold_1	57871344	57872333	+		g1191.t1	Y	Y	Tmai|g1191.t1|scaffold_1_57871344|OG0000362	MAANLSEILSGFLACVVFLSISLNLVVLITFYRLRQKLSFKDALMASMALSDVVQAIIGYPLEVFTVVDGRWTFGMELCQVAAFFITALGQVSIAHLTALALDRYFTVCRPFVATAIHGSMRNAGLVIFFSWFYASFWAVLPLVGWSNYNVESDGMRCSINWADDSPKSYSYRVCLFVFLYLIPILIMGITYILVQGEMKNMRGRAAQLFGSESEAALKNIKAEKRHTRLVFVMILSFVVAWTPYTFVAMWVSFFTKELGPIPLYVDTLAAMLAKSSAMFNPIIYCFLHKQFRRAVLRGVCGRIVGGNAIAPSSTGVEPGQTLGGGAAES	2	Tcop13
Tripedalia maipoensis	scaffold_1	67008929	67009888	-	Y	g1372.t1	Y	Y	Tmai|g1372.t1|scaffold_1_67008929|OG0000362	MALESNISIGEVDKSTLQLCNFMGGYTSVVVVVGVIMNMCVITGILRFFKRMDPYLMLVLSQGFCDLLSPLVAYPLSLASSFACRWLFGDAWCYYYGFVTSFAGYTSIFNLTAFAVERYVTFKFPLKRERVLSKRNMIIMIAIVWIAGFAWAALPLMGISAYVKEGIGTMCSVRWHSDDDGDFYYSLGLIICAYLLPVFIILMCYKSFLGIIYSIMPRSRILGNPELQTENTSVERQQTFIVVFMVLWYNIAWLPYALVCFISAIGYPNLISLQAACIPGVFAKTSNIINPIIYCFISKQFRSTIFGKNKVAVTEKTENL	1a	Tcop11
Tripedalia maipoensis	scaffold_1	67044030	67044977	-	Y		Y	N	Tmai|scaffold_1_67044030	MNTSLKESDSSQQYANFCLFMGSYIGCVVVIGAIMNSLVIIGLLRFRKEVDLSSSFIISQALCDVICPFFAYPLSASSSFNCSWLYGYYGCQYYGFVTSYAGYASIFNLAVLSVERFVTLNYPLSRERLINRKNVTLAIVTLHTAAVVWAIIPWFGVSAYKPEGVGTMCSVQWHSDDESTFLYSVLLIVGAYILPMVIIIYAYTRFLREIYLLSPRALSFNNQEISQSAREIERQQTLLVFLMVLGYNLAWFPYALVCFISIIGYPEIISPVAASFPAVFAKTSNVANPIIYCLLNKQFRTLLFRATRVSPGEEGQ	1a	Tcop1
Tripedalia maipoensis	scaffold_1	67028484	67029431	-	Y		Y	Y	Tmai|scaffold_1_67028484	MLNNTLIQNVTTLPNFRGFCMFLGSYIGCVVLVGTTMNLVVLIGLLRYRKCLDISSAFVMNQAACDLVAPMFGYPLSASSSFQCSWLHGRAGCVYYGFVTSFGGYCSILNLSLLSVERFVTIAFPLSRERLLTKKNILFSISMVWLFGFLWAILPVFGISSYEPEGIGTMCSVTWFLDSNIALMYNAALIIAVYCVPMAIIAGCYCKFLFEIFKIGSRAAALQGGDAEMTVAAKKMERQQTCMVLLMVIFFNVAWLPYTLASVLAIFGRKDLIGPVEASIPAAFAKTSQAANPIIYCMLNKNFRNFIFGRGNKITP	1a	Grp1a_N1
Tripedalia maipoensis	scaffold_2	16800407	16801612	-			Y	N	Tmai|scaffold_2_16800407	MTLFGCYLLFVSILTVPPNFLVILVFKNIYMARPGLINLLIVTVSFNNIVQALVAYPLAIASNFAKKWIFGHYGCQFYGFCVHVMALSTISQLAVIAYRQWKIIQSNEIQQKYLTLRSQVAILIGTWIYGILWSIPPYFGWSKYVSEGIDTSCSVAWESDATIDQSYTVSLLISNFTLPFFVLIYSYFSIWRMMRRHVNIRISTQKTQPSSGCKRERGKTDGSGKVNAELTLHSIKSDTEQTAKATSAERQSAYGKQSCKDTLKSAPENQFTDKVCTFDSCEITISLPANNFNDTKRNSANTTTEVEQGQSSTKLQLGAKLRREHIEITKTLVMIVVFFLVAWLPYVVLSIAVLSGAANDISPIAKTVPAYVAKASTVCNPLVYGLRHPLFKREVRNLA…	1b	Tcop17
Tripedalia maipoensis	scaffold_3	24045449	24081732	-		g6626.t1	Y	N	Tmai|g6626.t1|scaffold_3_24081732|OG0000362	MAKFPETFNLTSPSTYNILGGYLTVIVVLGTVLNLFVFAVLVTHRTKISYAGIIVMSMSCCNLLGPVFSYPLSVVANFKKGWHLGSALCTWYGFNGSLVGFCAIYHLMLLSVERYISMVYPLTRDRIISKTSLTLSLVVSWLVSLIIAVLPIAGWSAYEPEGVGTSCGPRWTSPETLDVTYKLFMFFSGYVFPMSVVSFCHSKFLKEITKMTSRIQSENSRKMEKQMTIVVFIMILAFNVAWFPYACTSLVSMFAPPDKSLSPLAVSLPAFFAKAAVIYDPVIYAMLNKEFRMMLSRRSRQVGDWSDPSLS	1a	Grp1a_N3
Tripedalia maipoensis	scaffold_3	39129899	39130789	-			Y	Y	Tmai|scaffold_3_39129899	MKLFQTTPECVLYYFKCIIAILGSVMNATVLVSGFLPRNVRHIKPMTIFALFMATGDLMICSVACSIGIFVLLGSEWKAGGQLCSLYGFICTIGGINSVYQLTGLSLERYYSLRYPFHSSMFTTRGGCLLSGVIFALCSSVLAVMPIFGWSVYSPEGLGLSCSIHWRGNSVEGNAYILLLFLFGYIIPTCVQIFCNYRFSSLPGDLVRDSIKRQGRKSSINSRKLQRQVTSMIIVMTVVFHILWLPYALASVTAVFGTQLRPLYASIPAMVAKLSSVLNPLIYFLMNKGFRKMCSRK	1a	Grp1a_N4
Tripedalia maipoensis	scaffold_3	49848083	49849015	-			N	N	Tmai|scaffold_3_49848083	MALQPDFSTFGIFIGCFILTALILAVLLNGMVIYGLAKYYKQLDFCGIIVLSLSISDITAPVCAYPLSAYSSLQAVWKFGDSGCYWYGFVTTLTGLCSINHLMLLSIERYITLVLPLRREELLNKTKVLVAIAVCWIFSFCWAILPVLGWNEYRLEGIKTMCSINWQSRSSLDFAYNILLFIVCFLVQEIIIVFCHQRTLREVKKMTLRAIRTHGSNSQTYLNLVKVEKQQSFVVLFMVMGFNFAWLPYAITSLMVIMDLQHLLSPLAETLPAMFAKSAAVYNPLIYFVSNKLFRLMLCGRSAVVSPSEME	1a	Tcop6
Tripedalia maipoensis	scaffold_4	5360396	5361208	-			Y	N	Tmai|scaffold_4_5360396	MTPAPNIFYILIGSIATFSVSMNSLVIAVSFKQRHQLTTRGIIRLSLAISDLLQAALGYIPEIVLSNLFEWSSTFQLCKLVGYIVTTLGLVSLSHLVLLAMELYINICKPFLGDLYIEKSKTRFISLLLGWSYPVTWSSVGFAGWGSYGVESFTYCSIDWSDTSWKNTSYIACLFIFCFLLPLIALSFCLISTRLEMGTLYKRAVQSMGKDNTQDTLRCKQKIFRLTNCMVSAYLMCWMPYSCVAIVTIIMADMATAHQGGPFLSLAFLQK	2	Grp3_N1
Tripedalia maipoensis	scaffold_5	43122723	43126168	+			Y	N	Tmai|scaffold_5_43122723	MVYFSLGLVMFVIIIWSGSLNGTMVFLFRRIYCQEEGSTNLLILSLCVCNLVQSTVTYPLNFVACSQHGWTLGNAACIADAFLVKVHWMAITFTAHLVALSFDRYNAVFSLWLSKIPAFKYVAVAACWIYGLILSSMPLAGWSTYKLEGLNLSCSVDFSSRDPSKMSYALTLMLTNFLIPLFLISLFYCKIYNGIKRHNRKLVRRGTQSKSAATKCIERRLTTLILVMVLSFVVMWTPYLIVCAVSVMRSNPPAPLVATLASFTAKSSTCFYPIVFGFRHTPLRREIRKILRRRANCTEPIRFNSRWSNEPQN	1b	Grp1b_N3
Tripedalia maipoensis	scaffold_6	5875857	5876783	+			Y	Y	Tmai|scaffold_6_5875857	MVNQTVRSSYTGSEFRHGLFYFMGAFIASTTVLSLLLNGTIIVVLLRNRKRINSVSLLTLNLAIADGIGPFLAYPLSSTSNFSQTWLWGDIGCNWYGFIVSFGGYSSIFHIVALAVERYVSISCPIRRSFFTRKKNVYILSVSLWSLAFLISLAPAIGVCGYKNFSSMCHIDWTCHSFQGRIYKMSLLPMCLLGPDLLLFFLFFRVYSTLNSMSRYAIQTQGQKSAMYCRSKKTERQQTILVCAMAAGFNLAWLPYGVLSLLLFLENWKVKEPQVIVANLSSALAKLSTLYNPALYFLTLREHRRLLLK	1a	Grp1a_N2
Tripedalia maipoensis	scaffold_6	20853347	20854309	+	Y		Y	Y	Tmai|scaffold_6_20853347	MENASINSTTNLGGSRERNSLPVIHAIFFGIVLTITVIGVLANLLVIYIFLRIYRANGITINIIIISTALCDISLISVAGPIHASSYIKGFWHIGYVGCQFYGFWVHFTSVSSLANLVVIALERYTVIKNNVIRDVRPLSVQLLLAAGALSYGLFWSALPLFGWSSYTLEGLNTGCAPKWVSRDVEDVSYNVVLMITEFLIPLSIITFAYIKMVKLMKRHSRVLSRMEANRVNLARRNSAIKVTIRLILFMVGAFLISWLPYTVFCLFAMITGPHNFPPIVAALPPIFAKSSVMWNPIIYAMKHNTFKVYLHRSLESMLKK	1b	Grp1b_N1
Tripedalia maipoensis	scaffold_6	20877104	20878207	+	Y		Y	Y	Tmai|scaffold_6_20877104	MNVTPTITSFNFSEWNNTTAETENESLEVLGHLLMVALSLITIIGLPANLVVVFIFRHVYASNPSSLNMVIISSSICNLLLILVAGPVHTDVYIHGRWRLGYDGCQFYGFWVHFTAVSELSHLTIISMHRYYLIASKQRARSQRVEQQIALVSAAWIYSALFAVLPFLGLSRYDFEGLHTGCAPRWGSAEIKDASYNILLLFFEFVLPFSVILYCNIKLIKTINVHNQRMIDRSTTEEITKRKEAQRNVQYMIIIMISAFLFSWLPYTLFCVVGMISRTNLASSKLGAIPAVFAKSSVIWNPIIYGFKHNLFRQRLRQVWRQCCHSSVRDASMGSTNRSNTIAGLRRTSRSKKPALISIKPYTPSSVM	1b	Tcop10
Tripedalia maipoensis	scaffold_6	20897365	20898411	+	Y		Y	N	Tmai|scaffold_6_20897365	MALLGNTTNVSFATSSGNVITAERELLPLTAQIVLTLIIGTITIIGVPANLLVIYIFSRIYRNSPTTINLMIISITLTDFMLITFGGPVHTVSYILGRWYFGHFGCQFYGFWVHFCSVASLSHLVVISIERYLVVKHNVKKDQRAFWKQLLLVSTAWLYAIFWAVLPFFGWSSYELEGVHTGCAPKWVSRELIDTTYNITLIFTEFIFPLMVIVWAYWKLIRKIKEHNAQILKTNSSEQALIRGRMIMKSTTRLIVLMVGAYTFSWLPYSAICVWAMLVQKKDFPPLAAAVPALFAKSSVIWNPLIYGTKHAGFRNELAKLWERLRSKSQVRPNDKPKRPKVDFKEEEE	1b	Tcop2
Tripedalia maipoensis	scaffold_6	20924360	20925331	+	Y		Y	N	Tmai|scaffold_6_20924360	MENLSSLTNKSHLNLSNAEPDINEGTFRILFYIIGSITIIGVPSNLFVILVFQRIYRNSPTTINLIIISTTISDFMLITLAGPVHTFMYFKRQWTLGYYGCQFYGFWVHTVSVASLSHLTVMSVERYLIIKSRKKVETRPFRYQILFVIFAWGYAIFWAVLPFFGWSAYVKEGLHTGCAPEWVSRKAIDVSYNIVLIVTEFILPLAIILWAYCKLLDKIKEHTRSMAQSQNSEVAIKRGEVVVRSTMRMVILMVVAFVFSWLPYSGICVWAMVVGKRDLPPLAAAVPALFAKSSVIWNPLIYGTKHVAFRNEIHDMFRRLRGKS	1b	Tcop_GEO
Tripedalia maipoensis	scaffold_6	23096342	23097280	+	Y		Y	N	Tmai|scaffold_6_23096342	MVNRLSSDGVYNLVGFVMLVVFVVGSTMNAILIFIFRSIYNKARSCTNLLILSLSVCNLLHVTTYPLNFIAAFSKGWLFGRIGCLLDGFWVHWMAITSICHLTLLAVDRFLVMHSKQIIAFRSYKYVSALGCWTYGLFWSIMPLLGWSKYTLEGIQVGCSANFDSHKGEDFSYHIILFLTNFILPLALIAGCYIAVYHKLREHNNKVGDILTATVVKSTRGDMLEKKLIVLVSHMILAFVIAWTPYAVVCLLLTIDSNLVSPVAATLPAIFAKASVCYLPVVYGLRHTEVRKRFRKFTQNTRWSREVPNSEVI	1b	Tcop12
Tripedalia maipoensis	scaffold_6	23123974	23124936	+	Y		N	Y	Tmai|scaffold_6_23123974	MTQNGTEDGVYNLIGLVLILIFILGLILNGVVIVIFRFLHKETKSCTDFLILSVSYCNLLHVLTYPLNIVSSFKHQWGYGSLFCRMDAFWVHSMSIVSIAHLTALSFERYLTVTGRITNRSPKMKLGLALACWSYGFLWGVMPLFGWSDYRLEGLLITCSMKFSSSDPEDVSFAVVAFLVDFLVPLSIITGLYVAILIKVRRCNRSNAMEKQGPSITVINGAVVSDLERKMISLVFLMVAAFTFSWMPYAIVCFVTMVSKNALHPIFATLSAVVAKSSACFFPIIYGFKHRAVQAGLRRLLSVLRPTNQVSVYNSSISAQQ	1b	Tcop15
Tripedalia maipoensis	scaffold_6	23136095	23138410	+	Y	g9778.t1	Y	Y	Tmai|g9778.t1|scaffold_6_23136095|OG0000362	MKHGLLASKGRSYNRHFQAPDISLRRSPTMETKVPGAVYSLVGLILIVTFVFGLVLNGFVILIFHSIVRESKTCSNSLILSLSYCNLFHVLSYPLNIVSCFQRGWGFGRMICEMDAFWVHWMAITSVAHLTMLAIDRYLSIKSISVVKGPIYMRLVVPSCWVYGLLWSALPLAGWSSYDYEGMDISCSAKFGSSASLDVSYDIALFITDYSLPLAIIILCYVGIYQHIRRHNSVVFNGTTAIPGQDSSTSMERKLVSIVILMVCAFTIAWTPYAIVCFLMLTRGGPVNPIATTLPAIIAKSSPCYFPIVYALKHSAVRRGCRRLLSMMRVQPERNTSVNTHFS	1b	Tcop8
Tripedalia maipoensis	scaffold_6	27642000	27642914	+	Y		Y	Y	Tmai|scaffold_6_27642000	MALNATELDGVVSAEVFTGLALIIAGITLFGSVTNGLVIAVFIGLYKSNPTAFNAFIISTAVSDFLLITVSGPINILSASKRRFALDSAGCQFLGFWVHFMSVTSIAHLTALAYDRYALLSTQNTRITTSRRKHVLYIICCWAYSLFWAVPPLFGWSRYVKEGIGISCSIDWKSHLPADVSYSVVIMFSEFFVPMSLIMIFYRHIFVSVKLYNRESSDESCPSRKTAMEKNIATVVIIMILAFVFAWIPYVIVALWAFIASDANISPLAATLPALFAKSSVIYNPIIYGMKHTGFKQKIRGMWRK	1b	Grp1b_N2
Tripedalia maipoensis	scaffold_6	27653366	27654313	+	Y		Y	Y	Tmai|scaffold_6_27653366	MTNNSSSGIKVQVGMKASENAYDVVAGIMIFITIFGTISNGIVIYVFLQIFKGCKSTFNGLIISITVSDMLMIAISGTINIASGFNRGFVFGKAGCSFLAFWVHFLSVSSVAHLTALSFERYRVISERSVRHTFSWRWTTFVILICYFYSFAWAIPPIFGWSSYTAEGMEISCSVNWKAGDWNSVSYNITIMFTVFMIPFGIIFQCYRKLFQLLKNARDVDLGSPDLAKRRSVEKRVFSLVVVMVVAFLISWFPYVIMSIWCMLPFTQEVSPLAATLPALFAKSSTIYNPIIYGMKHWAFRQRISRAWRKRFRKRI	1b	Tcop4
Tripedalia maipoensis	scaffold_6	31684810	31685751	+			Y	N	Tmai|scaffold_6_31684810	MEPRNSTDLHGEGSDFLYIEKNYGFLIGILAFLTAIGVPVNALVVFVFYRLYKRSSTTFNMIMISTSLGDLLLIAVAGPTRVVSYLKGVAKLGDIECKIYGCWVHLTSVASLGHLVLLAVERYLVIKQEKKQDDRPTWRKILLVLAPWLYATWWTILPLLGWSEYAPESQHVGCAPKWISTDPIDVSYNVTIMISEFFFPLAIIIAIYFKIFGLIKDHMNKTGSEAVREIHVQRNVMMLTMLMVATFVFCWLPYTVCCLWAISTNKNLLPTGFGALPSIFAKSSVIWNPILYGAKHLKFRREICRAYRQLRGRS	1b	Tcop3
Tripedalia maipoensis	scaffold_7	1869220	1870143	+			Y	Y	Tmai|scaffold_7_1869220	MEWYGSNNSSTAKGAVLIKEYHSVALSVYLSLVTLLGVLTNSSIIVVIIRSRKKQDFHLFNTFLAFVTTLDLMACTTVYPMATISTVHGGWLFGEKGCHLYGFISTFVGMNAVYQLTALSVERYWRMRNMLSVDKLISRWKSLAYAWILSCFAFAIAIAPIAGFSQYAPEGIRTYCSITWFAEDNSSRIFVIVMFTLGFFIPTIIQLYCNFGFLRLISRMQTRSRHLTGKHSSMTSDDRRMQRQMGFMVFCMVVAFHIVWMPYALTSLMSFFGVKLQPLQTSLPSFFAKLAPVLNPLIYFVMNKRFRL	1a	Grp1a_N5
Tripedalia maipoensis	scaffold_7	1988659	1989579	-			Y	Y	Tmai|scaffold_7_1988659	MNNTGETGVNSMTNQTFLLFFFIYYAIMTFLGITINMTVIITLLHPRNMKHIASMHVFVLAIVVVNFLVSATAYPMGTLSVYHKTWIFGDLGCKYYGFSSTFAGLNTINQLTALSVERYLVLNNALRIPESMTKSRVLAVALTLSTIALVMSLLPLAGWSSYVPEGIKTSCSIDWKSKQLNARSFTLFLLTAEFLIPSTTQIVFNTKFLKLVIHLHRNSVKLSGKKSTLAVDARRKQNQMAILTTVMVIGFHVSWLPYAVMSLLSLAGVHVTPLQQSIPSYFAKSSLVSNPLIYCFMKKRFRAILCR	1a	Grp1a_N6
Tripedalia maipoensis	scaffold_15	11587631	11588524	+			Y	Y	Tmai|scaffold_15_11587631	MDTRYSPDVYKSLAVFLIAVSVIGGILNLLVIVVFTKLYRKDNKFLNLMIVSTAIADLLPSLSAYPMTAYRTYRRQLYRHDSNDCNFEGFFIQLTALVSVSHLALMAYERYMVITSGISRVLSPQWHIAISGSVWLYGLLVSCLPLLGWSSYQPEGLETSCTVSWSSRRVLDISFNALLMLADFFVPLVVITYSYARLWHFTKHNGFKRQWVDSAVNAHRWRVRRKNNRSMTLMVLAMILMFLLAWMPYVVVSFWSLVKSTPKEYPLLATMPSVFAKSFTLLNPIVYGIKHYKFRREI	1b	Grp1b_N4
Morbakka virulenta	scaffold8	5218764	5219669	+			NA	NA	Mvir|scaffold8_loc_5218764	MTQVFGEVIYLGLASFITTVSITGTILNLLVIIIFVKLYRRDYKFLNLMIASTAISDLLPSITAYPLTAYRNYSKRAYKDSSIECEFEGICIQLAALVSVSHLALMAYERYVVITTGFSPILSATWHLIIIGSVWIYGILVSCMPLFGWSRYVPEGIETSCTVNWRSRNVLDISYNSLLMFVDFLLPLCIILYSYFRLWYFTKHNGFKRQWVDSVVNERRWKIRRRNNRTLTLMVLIMTIMFLGAWTPYMVVSLWALIFPSHALQPLAATIPSIFAKCFTLLNPVVYGIKHRQFRRELRRSC	1b	Grp1b_N4
Morbakka virulenta	scaffold25	109543	110529	+			NA	NA	Mvir|scaffold25_loc_109543	MVTEAVLSKIFSTILILIVTASVTFNLIVLITFGNVKRRLTFREVFFVSIALSDLLQGLFGYGVEIVTTADGYWSFGALACQMVGFIVTFLGLVSVNHLALLAVDRYLTICHPKKTEKIHKSRTNALFFALLGWVYAFVWAILPVLGWSGYSIEITKIRCSVNWQNRSISGKTYVVCLLLFGFVVHIIILAFCYYKIHKTFVRLGNSAKSPPCQIEKSLTLRLNPGVEKRYARMVFAMIFTFLLAWLPYCVISLLTTFSSDFEPSMPLELGSALLAKSSTVFNPIIYVFHYKNFRKELTRICTGSCCGVDESEMRPTTNLELNRKQEIT	2	Tcop9
Morbakka virulenta	scaffold29	3716259	3717170	-			NA	NA	Mvir|scaffold29_loc_3716259	MENHTTSSNNTAVVNYQSFCKLLGSYITLVNIVGTVMNLVVLIGLFRHRKYVEIKSAFVMNQAACDLVAPIFGYPLSASSTLYCSWLYGHQACIFYGFVTSFGGYCSILNLALLSVERYITLSHPLKRESLINNRNIFLSISCIWIFGFFWAILPVIGVSSYKPEGIGTMCSVTWFSEDTDSIVFTLSLVIGVYLLPMGIIIFCHFRFLLEIFSIRSRASNLHGQDSEIASEFKKVQRQQTFMVLIMVISFNISWLPYALSSLITIAGHAEILGPVGTSFPAVFAKTSHAANPIIYCILNKQFR	1a	Grp1a_N1
Morbakka virulenta	scaffold36	2022963	2026031	+		Mvir|scaffold36.g49.t1	NA	NA	Mvir|scaffold36.g49.t1	MGASVTQVLSGFLACVVCLSITLNTVVLITFYRLRHKLAFKDALMASMAFSDVVQAIIGYPLEVFTVVEGKWTFGMELCQVAAFFITALGQVSIAHLTALALDRYFTVCKPFVASSIHGSMRNAGLVIFFCWFYAVFWAVLPLVGWSDYNVEGDGMRCSINWADDSPKSYSYRVCLFVFLYLIPVFIMGMTYIFVQGEMKNMRGRASQLFGSESEAALKNIKAEKRHTRLVFVMILSFVIAWTPYTFVAVWVSFFVKQLGPIPLYVDTLAAMLAKSSAMFNPIIYCFLHKQFRRAVLRGICGRIVGNAIAPSSTGVEPGQLGGGTAET	2	Tcop13
Morbakka virulenta	scaffold43	1428967	1429881	-			NA	NA	Mvir|scaffold43_loc_1428967	MSDVGTQVYNIVGGFLVSISILGGLLNSFVILFFFRLYKRERLLINLLIFSTAISDLLPSLYAYPIAAVRTLKQDAFKKNNLACTVEGVCVHMSALSSVVHLATMAYERFSVIKCGTSKIFSVRKQYVIVICIWTYSFLVCILPLLGWSSYEPEGLNTSCTANWKSKKAIDVSYNLFIMFTNFLFPLIVIAVSYIGLYRYVKKNSFNTHWSDSQIRRDFWKKRREKNKALAGMVSLLILLYLVTWTPYVVISLYNIMSYSTYFDPLLETIPAIFAKCFSVTNPIIYGIRHHKVRAEIRKLYFSIC	1b	Tcop16
Morbakka virulenta	scaffold71	1245770	1246666	-			NA	NA	Mvir|scaffold71_loc_1245770	MAFETQDYRLLFCFVATIIVCCSTFSNILVLMVFKNIGTVKTVRDLLRISMAVSDILQAVLGYLPEIIIVLLGNTDGTLAFCKISSCFTTLLGLVSITHLAVLSVEMYYNICKPYFSYKYFQMLRIKVLIVVGAWVYAIFWATIVFSGWSEYAVETKSRCSIKWTDTSPANTTYVVCLFTFCFLLPLAIMIFCLRRVQMDVNIIFLTECKERGAKYSLEAFKSRKKTFTLTTCMVLSYTCVWTPYSIVVVAALVFAKYKMVMPPPVFFVTALLAKSSSLLNPFIYAFYGKHFRKEAAKL	3	Grp3_N1
Morbakka virulenta	scaffold100	2211804	2212685	+			NA	NA	Mvir|scaffold100_loc_2211804	MKSLAIAIYLLLLTISGLLFNGIAIYLILFCGAFREAVSMKPLLLNGMIVDQAICLLSYIFSIWSAFSGSWSFTDDICTYYGFMTTFDAMNSIFQLTGLAFERYTTINMPMRSYIILGRNKATGLSLVLTCFAFLLSVIPLTKWSNFHQEGLGISCSIDWELHTQSNYVYVGILFVAGYLLPVSLQLYFNFRFLNAVKRMKKTSILQYGRRSSLAVESDRNVRQMNIMVFAMNLSFQIIWLPYAVVTLIRLFDVKVSGIVATIPSVFAKLSIVLNPILYCFMCKSFRSALTKCT	1a	Tcop14
Morbakka virulenta	scaffold112	1323726	1324616	-			NA	NA	Mvir|scaffold112_loc_1323726	MMDLPDTPKAVYDIFGLIMMLIFFFGLILNTFIVIIFRRIYDESKTASNLLILSTTYCNLFHILTYPLNIISCFKSKWVFGAIVCRLDAFWVHFMAITSVSHVTMLAVDRYLSVKRKTITLSRNYKIMSVSICWVYGFMWSVMPLLGWSDYGIEGIGISCSAKFGSASKEDMSYHITLFFTDFILPVLTIFICYLAIYQHIRRHNQIIYNGDAAIPGNEAAVSAEKKLLTLVVLMIGVFVISWTPYALACFIMMAIQNQIHPVAATLPAIIAKSSTCYFPIVYALKHNEVKRRFNKM	1b	Tcop8
Morbakka virulenta	scaffold129	2547961	2548869	-			NA	NA	Mvir|scaffold129_loc_2547961	MEKSQNDTLSRKFDIFVGSFITVTTISAILLNGIAIYVLIKRFQQLYWSDVIVLSLSICDLIAPASGYPLAVYSSINKTWMWNKARCYWYGFINTFTGLSAINHLMLLSLERYISLVLPFRKQDLVTKPKVLIAILICWSLALVFAGAPVFGWNSYKVGEGMNSRCSINWKSHNSVDLSYTVFLLLFGFLWQEILMLYCHFATLREIKRMILRASATCGQNSQESCDLIKIEKQQTYMVFFMVAGFNFAWFPYAVISIMYIFGYYSLNPKIEIWPSLFAKMSNVYNPLIYFLSSKMLRCTLCR	1a	Tcop6
Morbakka virulenta	scaffold131	1591252	1592103	+			NA	NA	Mvir|scaffold131_loc_1591252	VIGIITCIGIPANTLVIFIFSKIYKSTPTTINMIIISITVTDFLLITVAGPIHTSAYIRGEWYLGDAGCQFYGFWVHFTSVASLINLVFMSLERCYIVMYNVRNDQRTFWKQVAFVSLAWLYSAFWAILPFFGWSSYCVEGVHTGCAPRWKSKETIDVTYNIVLIFFEFLFPLIVLAWAYWKLHKRITQFNVTVSSNNASERNFIRCKRIKRNATRLMVLMVAAFIFSWLPYTAICIWAMVAHDSSFPPIAAAIPAMFAKSSVIWNPLIYSIKHSGFKYEFNKI	1b	Tcop2
Morbakka virulenta	scaffold260	1184193	1185077	-			NA	NA	Mvir|scaffold260_loc_1184193	MAAINFGQSSNVIFLLVKGFVVFFGTLMNACVIISILCPRNLRSLKPMAVLVLFMAFGDFSICVFAYPLGIDAALRQYWDKQQYTCNFYGFLCTFGGINSVYQLTGLSLERHFSIKYPWMDSIFSTVRGCILFSAFAVLAALMFAGLPLVGWSKYSPEGLSFSCSIQWGEKSAEATTYIIFLFTVGYIIPSAIQLYCNLQFLKEIRNIVRGSIKSQGQKSRIAVNTRMIQRQMTSIIVLMTVCFNILWLPYATVSLVEIFGLNVSESCRNFPSLIAKFSTVANPTIYFFMNKNLR	1a	Grp1a_N4
Morbakka virulenta	scaffold393	96716	109106	+		Mvir|scaffold393.g4.t1	NA	NA	Mvir|scaffold393.g4.t1	MNRTSNDTMSVSKISIDDLYYKEFYKFYTFMGCFIASSACLALLFNSLVVFVLVKNIRTITNTNIIVLSMSICNLLIPCLGSPMSSTSSLMRKWQFGDAGCVWYGFINTLSGISGIYHLTFLSFERYITIVHPMKRELILSTKNVYIGVAITWALSVVVCIPPVFGWCSYVREGVRTFCSVEWGSMANPNVFSYNMFMMVIAYIIPIVVILYCNHQFIKEVSVISARARGLQGGESEMSSSATKAEKQLTIMVVLMIVAFNVAWLPYTIVCIVSMVSGANVSPMGASIPAIFAKTSVVYNPVIYCILNKSFRRLICNNTVEPE	1a	Tcop18
Morbakka virulenta	scaffold529	35466	36335	-			NA	NA	Mvir|scaffold529_loc_35466	MEPRVYFGVLGVVVIMAITLNSLLIAKIIYYRKKITVRDCILLSLAISDFLQATLGYGVELANNSFGIGGMNPVMCSTSGFLITWFGLASISHLTLLAYDRYMIICQPFAAQLLHENFCRFALYILGCWCFSLFWSILPLVGFTSYQMDKDMYCTLKWSTDDIYDEVYIILLFTFCYFMPIVFLGILFFRAKAELSKMRQRNIRRTSVNSACVQKDMAAERQNNIIVCTMIGAFLIAWSPYTIISFVRAFGKGNAITPAIRQIAPLLAKSGCTFNPIIYALLSRKFRADI	2	Grp2_N1
Morbakka virulenta	scaffold1632	2042	2692	+			NA	NA	Mvir|scaffold1632_loc_2042	MFVWKNVTFKNSTAIDHRNNFSYWFLAVYLLLLTCFGTFSNITILVIVCRNKDRRKGDVRNIFLTHMIVINTFSCILAYPLSTVSTYRKQWIFGNAVCAYYGFLSTFDGFNSIFQLTVLSVERYWKIKYPMTSHWFYSKSKSRKLSLVFSLISLFIALCPLWGLSSYQEEGIGTYCSITWNSPKLKDRVFILFLLIFIYAFPSSVQIFCNYKFLSLIRNMKNRSTVTNGKRSNIAQDSRKLQRQMAFMVSSMIIGFHICWFPYAIAVILSLSGFKLRPFQTSLPSYFAKAGIAINPLVYFLTNKTFR	1a	Grp1a_N5

## Sheet: 7
Species	Scaffold	Start	End	Strand	Gene_model	Seq header	Seq	Group	ChromMapLabel	Tandem duplication (<100kb)
Tripedalia maipoensis	scaffold_1	19141004	19156073	-	g335.t1	Tmai|g335.t1|scaffold_1_19141004	MVAREKRAIMKTFMLTLVALWISRANGNRLQQVFTEAGKKLSDVKNMATQMATDLHTKVTMAAGGINVQSKVEVVQKKWNNAVQEYNNDRAVGAGKIKDAVAGVGTGLVSFVQGIKNEDWVTGVQGALAIISSVVALAGPVGVIASGILSFLSSVFSLFGGAKKTESMDSKIERLVSKQIDIARQKDLEAQVQGFKLSYESLSDSIQDFREGKELETDQANELYNQAFLGLSILGKFQARINEICDDLNDHVNASKCLKTMALYADMSIIRQLALADMAALLADVYHRKVDDEPILEEIPSDEAIMEEAVEDTPEEKQKKLAKARGLLVISNNLLHLIKKEQEKDRKFLRFLGDPFNHPLRRYVISIYFATPDKYPSLKAYVRTLHKVVPGGFFMDYVM…	JFT-2	JFT-2_1	Y
Tripedalia maipoensis	scaffold_1	19165727	19175905	-	NA	Tmai|scaffold_1_19165727	QRAIMKTFMLTLVALWISRANGNRLQQVFTEAGEKLRDVKNMATQMATDLHTKVTMAAGGINVQSKIAVVQQKWDNAVQHYNNDRAAGAAKIKDAVAGVGTGLVSFVKGIKNEDWATGVQGALAIISSVVALAGPVGVIASGILSLLSSVFSLFGGAKKTESMDSKIERLVSKQIDIARQKDLEAQVQGFKLSYESLSDSIQDFREGKALETDQANELYNQAFLGLSILGKFQARINEICDDLNDHVNASKCLKTMALYADMSIIRQLALADMAALLADVYHRKVDDEPILEEIPSDEAIMEEAVEDTPEEKQKKLAKARGLLVISNNLLHLIKKEQEKDRKFLRFLGDPFNHPLRRYVISIYFATPDKYPSLKAYVRTLHKVVPGGFFMDYVMICTSD…	JFT-2	JFT-2_2	Y
Tripedalia maipoensis	scaffold_2	27321560	27326318	+	g5453.t1	Tmai|g5453.t1|scaffold_2_27321560	MALQLFILVLFASHWWMACPKIITESAADPAGEEEGEPTPPANFSQANKRLLKNGKKSMENIKILVAKMRGDSSTKHMIPGSSQQFTTKIANVGKKWVQASKAAYAADQEGMAERISGAISGAGEGLVGIVNGIKDKDWKTGVQGALTIASSVAQLAGPVGMIAASVLSFISSILDLFGGSSQTESMDDKIERIVKEQVDIGREKNLKAEVEGVRMEFASLSTSVQHFRESKKLKEHQANELYNHVFGGLMAFGKLRDRINEICDDITEYDPAIKCLGIISLYAEVSILRQLILTDMASLMADVKDAKSEACARNANKLKRKFSRRDRSGSADLSEAENDCGGNLLVVANNILNIIKKEQESDSNFLLFMTNPFNFPKRRYVISLFFSNPEKYSSLNAY…	JFT-2	JFT-2_3	Y
Tripedalia maipoensis	scaffold_2	27339786	27345232	+	g5454.t1	Tmai|g5454.t1|scaffold_2_27339786	MALQLFILVLFASHWWMACPKIITESAADPAGEEEGEPTPPANFSQANKRLLENGKKSMENIKTLVAKMRGDSSTKHMIPGSSQQFTTKIANVGKKWVQASKAAYAADQEGMAERISGAISGAGEGLVGIVNGIKDKDWKTGVQGALTIASSVAQLAGPVGMIAASVLSFISSILDLFGGSSQTESMDDKIERIVKEQVDIGREKNLKAEVEGVRMEFASLSTSVQHFRESKKLKEHQANELYNHVFGGLMAFGKLRDRINEICDDITEYDPAIKCLGIISLYAEVSILRQLILTDMASLMADVKDAKSEACARNANKLKRKFSRRDRSGSADLSEAENDCGGNLLVVANNILNIIKKEQESDSNFLLFMTNPFNFPKRRYVISLFFSNPEKYSSLNAY…	JFT-2	JFT-2_4	Y
Tripedalia maipoensis	scaffold_2	27363156	27364640	+	NA	Tmai|scaffold_2_27363156	MAFWLFILVLFALHQWMAILLPAHALMQESQNLTSPANVGSTNRKLLESSKQNMEKIIEMIKNMRQDPSTQHLIPGSSKQFRIKIASVRDKWIKACKDVYAAGEERMAKNISEAIEGLVSMMNGFKNDNWRNRVQGALRTLSSMAQLDGLDGKRAASFLAFVSSIFDLFGVSAQTKGLKDKTERVLKEHIDNVRGKDLNEEIEDMGFKMSSISSLGKQIQDSIKSKEEQAKEVKNQLIYSLKIRGKLKARIDKSCDNVTEYDTAIKCLDVINSYVSEGIESQVIVFDMASLLADIKDVKCKECDKYKKPPKLKGRQVDQLSNGNHSVNEEECGKSLLVDANNILNKSKENQEAEKNFLLFMTDPFNFPKRRYVVSIFFYSNHKHPELRSYIHTLHKVHP…	JFT-2	JFT-2_5	Y
Tripedalia maipoensis	scaffold_2	27387042	27388556	+	NA	Tmai|scaffold_2_27387042	MAFWLFILVLFALHQWMAILLPAHALMQESQNLTSPANVGSTNRKLLESSKQNMEKIIEMIKNMRQDPSTQHLIPGSSKQFRIKIASVRDKWIKACKDVYAAGEERMAKNISEAIAEVVEGLVNMMNALKYDNWRNRVQGALKTLSSMAQLDGLDGKRAASFLAFVSSIFDLFGVSAQTKGLEDKTERVLKEHIDNVRGKDLNEEIEDMGFKMSSISSLEKQIQDSIKSKEEQAKEVKNQLVYSRKIMGKLKARIDKSCDNVTEYDTAIKCLDVINSYVSEGIESQVIVFDMTSLLADIKDVKCKECDKYKKPPKLKGTRVDQLSNGNHNVNEEECGKSLLVDANNILNKSKENQDAEKNFLLFMTDPFNFPKRRYVVSIFFYSNHKHPELRSYIHTLH…	JFT-2	JFT-2_6	Y
Tripedalia maipoensis	scaffold_2	27419858	27425617	+	NA	Tmai|scaffold_2_27419858	MAFTLFVLVLFASQQWVAYPTIAIESSADSLEEENEKRTPPANFSSANQKLLENCQKNMKRVLELLMNMREDPSTQQFIPGSSKQFKIKIASVRSKWTKACKDAYDAGEEGMAKMIFEAISEAAKGLVDVVNGIKDDDWKTGVQGALKTVSSVSQLDGLDVNKPASVMAFISKIFDLFGVSAEIESVDDKTEGSKEYFDSVKEQNLKEEIEDMGYEMSSIRSSVKIRQDSIKPKKQGTQVVLEQMFSYYKLMDEYKVRIKESCDNVKRYGKAMKCLDIINSYASEGFERRVFMTELASSIVDLRDEECKECDKYKKDPKLKARQRDQRSIENPSKNYEDCGKIFLASAEGPLKAIREEQDNEKNLLLFIIDPFNFPKRRYVVSMFFYSNHKHSDLRSYI…	JFT-2	JFT-2_7	Y
Tripedalia maipoensis	scaffold_6	14136308	14137783	-	NA	Tmai|scaffold_6_14136308	MLCSSRYLFGLLLLGLIVHSLEDPVLNQINVQLNQMNVLVQKMPDGRQKETMLKVIRDTNGKTTGIVKKTKAKDMLVSINAALPKFISGEPTKIVSGVGDLLFGIAMFAGGPAGLAFGVLGGLLSGIMGLISPQKMQKSVEQVVQEALADHRDNELEAKADGIKRVFASYKAAQDRFRECLLENKTLITDSDVERLAPHGKIHQHSEFLGILSRRVSDGTESNSRRTFVIVRLTAEICKLHIFNLIDVHTLIKESGRMLVTAHMIGGVIEEVGRVCGDDLKFLRLQGTETKQYGVLGYYCPPNQDVKTRNVDVFLDYLEIPRVTAFPYTYTSVQTLKPQAYPNWMICACFRVWPPWGIGGSADIEKAVQGCKISEQSFNIRTEIRPASNGFYYLWVGRR…	JFT-1	JFT-1_1	Y
Tripedalia maipoensis	scaffold_6	14164357	14165805	-	NA	Tmai|scaffold_6_14164357	FVALVVIVLADKLENEIKAEFRKMKAQIQKMSAGKKRNQMLKEVEKISKETNAKAGGIAMKTKVKDMVVSINLALPKFISGEPTQIVGGVSDLLFGIAMFAGGPIGLGFGAFGGLMSGMMGLISPAKMEKSVGQVIQEALKDQYDDELEAKADGVKRVFSSYKAAQDGFRECLEENKTAITDSDVQRLAPHGKVHQHSEFLGILARRLRDGTESNAKRTCDLAKLTAEICKLHIFNLIDVYNLIKESGLMRVTANTIKRVIEEKVRVCGDDLKFLRLQGIEPKHYGVLGCYYPPNQNEKTRSVDTFLDYLEIPKVAKFPYVHNSVRTITPEAYPKWMICANEESLPADLIASIDKYTVQGCRFADFTNKMWTEIKAARNGFYQLWLGVTILSKISGRSE…	JFT-1	JFT-1_2	Y
Tripedalia maipoensis	scaffold_6	14186749	14188224	+	NA	Tmai|scaffold_6_14186749	MLFRIAHLVSFLFLTLPAANADNITLTQINAQFNQMNVLVQQIPDDKQKENMLKIIKDTNAKATGMVKKTKVKDMLFSVNNALPNLISGEPIKIVKGVGDLLFGIAMFAGGPAGLAFGVLGGLLSGIMGLISPQEMKKSVGEVIQEALKEQRDDELEAEADGVKRVFASYKAAHDGFREFLMKNKSAITDYDIQILTSHGKIHQHSKFLGIVARRLRDGTESNAKRTVVFVRLMAELCKLHIFNLIDLYNLIVESGKRAVAANMIKSILKEEVTSCTSDLKFLRLQGTKTTEYGVLGRYYPVNQDVRTKNVDVFLDYLEIPRVKEFPYTNKSMRTLKPKEYPDWTICAVEKRFIINQFSVSKYFVEGCKIQIYSHKVMTEIKPASNGFYQLWIRKILVT…	JFT-1	JFT-1_3	Y
Tripedalia maipoensis	scaffold_8	301880	302908	+	NA	Tmai|scaffold_8_301880	LFAALSSIFGLFESAKAQKSVGDIIKEALTAQQAEELKREAYGTKKVYDMSKAFDGVRQGEASLKGWEVSALSANFPIYSGAKFLAILWKYIEETTPSNKKECLRVIKLLDSYCKLWGLRKMLLYDLYSTISSAGNSPNIAKGTKRVYDMSDFEFKEPLTYLLKGDNKDKFALLMTLYPKEQNPAIFAFLNASKIPDPKGYQDDYSGKYYITNFKWPDYHLAMYVRTTSRSGGEKVIGGTTQKISVELSRLEDGYYTLGLSDEYIAKWGNLGMTRSDKNNVSDKNKFHLLPFQDDEKSFYLLKFKCQTDCLSNKYLYMKSNTDGSIREDTYEDMGNQGKWNL	JFT-1	JFT-1_4
Tripedalia maipoensis	scaffold_8	14808813	14810885	-	NA	Tmai|scaffold_8_14808813	MKLSHRRSPHVFLLLLLPVIMTPTMSVDPEMEGFQSALQQGRLANDKASPAKITAIENKLWNWKRWRNRDNRAMQKDYGSTIAGVGSGISTIVHGYRSGDVYAMARGSIDIIASVASLVAPPFGAIASAVLSLLSAILGVFGPKQPTMSEIFRKAIQQETERLFTQEVKTVMDEFESLQRRLQISRNSLEECKKNPQKFAECQEHYKTLGNLYHTTYMDRGDNLKVMFETQRERQCKPTFQNDDDIPRCCKLIKLYCDFAILRQIVLIDLVAFLSETGDDTMAKNLKTAMDLIQTRDRSFLNFLVDPFSASKHLRFVTTIMWSNPWYYDSILSYLVTLHKTAVLNGGKFFPEAATICTKSFLQGTCYLIGNSGMVEDNTCELIVSEPPGYSLVSAFIPL…	JFT-2-like	JFT-2-like_1	Y
Tripedalia maipoensis	scaffold_8	14828927	14830957	+	NA	Tmai|scaffold_8_14828927	RQKPEVCLKMKALLILLAINAFQSQGEEDVNSNGQETGEMNMQEAMEGFEEAKRVAEITKPTSAAREEATKKINELKKEKKNWRENAKKWSADDREFLIKNRPRQDEFPKAFKDVGVGIGKLANGIRSGDWSQTASGVLEMIGGFTQLLIPFGPLVSGALSAISSILGLFGVKQKSTAEILKEELRAEADIRLDEAIRGEMERLITVQNYLNIFRESMQNAKTPEEKRKLAKRYSAKVTEYDVLKEGGSKEVKFRDQRDTYCNLKNKDDTNMAKCSKWLKLYADFAVCQLQQLIDKINFYNETGNMYQAKDLRSRIIIIQERGKDFLGFLIHPEEQIEGFRIAATIIYENVFFHEVLLKYVTTIQKGLLHTHHFKKKILLCKNPYLQGDCKSRSEGTYN…	JFT-2-like	JFT-2-like_2	Y
Tripedalia maipoensis	scaffold_8	14842599	14860022	-	g11096.t1	Tmai|g11096.t1|scaffold_8_14842599	MQWLQRQKKGVYLKMNALLILLAINAFQSQGEEDVNNNGQETGEMNMQEAMEGFEEAKRVAETTRPSSAAREEATKKINELKKEKKNWRENAKKWLANEREFLMTNRPRQDEFPKAFKDVGVGAGKLANGIRSGDWSQTASGILEIIGGFTQLIIPVGPLVAGALSAISSILGLFGVKQKSTAEILKEELRAEADINLDNEIRGEMERLITVQNYLNIFRESMQNAKTPEEKRKLAKRYDDEVTKHHVLKAGGSKEAKFRHQRDTYCNLKNENDINMVKCSKWLKLYADFAVCRLQQLIDKINFYNETGNSIQETNMRNEVERLQHKGKDFLGFLIHPEGQIEGFRIAATIIYENVFFHEVLLKYVTTIQKGLRLTVKFKKEILLCSGSYLKGNCDSKS…	JFT-2-like	JFT-2-like_3	Y
Tripedalia maipoensis	scaffold_8	14863342	14865423	+	NA	Tmai|scaffold_8_14863342	MELSYGGVLNVVLFLLISVIATKAMDVDPEMVGFQNALRQGSLSNDKVSTKKVNAIESNIFKWKKWRDQDNRAYQKDYGAAIAGVGSGFNTLFSGIRSGDYFATARGAIDMIASVTSLATPPLGAIASGVLSLISAILGLFGPRQPSMSEIFRKAIREETERQFKVEVETVIDEFQNLQRKLQNYRETLETCKKSRKMLERCRKIYRDLANYHHIVYMDRGDMLKVKFETQRERQCKPNDKNHEDIPKCCRLIKLYCDFAILRQTVLIDLVAFLSETGDETMAKNLKSALDLFQARDRSFLNFLVAPFNTSSHLRYVTATMWSNPWHYDSILSYLVTLHKTAVLNGGKFFPEVVTLCTRAYLQGTCYLVGNSEMVKENACKEVEGDSGIIVSGFLPLGT…	JFT-2-like	JFT-2-like_4	Y
Tripedalia maipoensis	scaffold_16	4351630	4354711	-	NA	Tmai|scaffold_16_4351630	MARYLAHFCLAVALWLSAESALLQRRTTEEIEGDLDQAAQKVKGDSANARALKTKLSKLKTELNTKWNTDDNREKLVGVVSAITESIGKLQSDDPIDIATGCLDLLAGLASNLGPLAGIAPLFSVLSMVIGLFGGEKVQESVGDIVKKALKEQRDDELEAEAFGTQREFTVSKAFLDGIRKEPKTLTEMEVASLSANVPIYKGVKFLAILTQRIKKAAPTNAEEAKKVLAFMELLADLCSIRDVIILDLYQLVSSAGHSPNIAAGILEVKNVGRGEFRDALQELFKGNDPKYWILYSSFYPKNRSPQTKKIYKFLKTIGITDIPKIDDDISGRKIISALAYPEYCMASPSGGESMQGNYAKNQYKRECTITLRREQDGFYTMRVYQRRIAYASEEYVLL…	JFT-1	JFT-1_5
Tripedalia maipoensis	scaffold_16	7923005	7927348	+	g4222.t1	Tmai|g4222.t1|scaffold_16_7923005	MLAMTGRRKLPCISLWALLFILGALVHNGAYSKSRGAHKRSVDTEMANVEAALRGVTGDTTKVTEALESLKTEMKGDPNTARVEKASKILGSVGSALTKFKSNDPTQIISGCLDIVAGIATTFGGPIGLGIGAVASLISSILSLFNGGAGKNSVGAVIDRALNKHNDNELKGEAAGAKREFVTSAAYIEVLKASSNLSENTLDRLASNVPVLTGTRVLGMLEQRIMQGSYERDLSHAQRTVDFILLYFQLAIKQEALLTDLVILYQKSQTDRVTAQAIDAANQVNKETVKSSIEFLHNLKPAQALVGAVYHPIEKSLVSQLIYNYTKYFNIRDIPHELSGSYIFNNVYWKGYGICSEAYMNNYMFRSCYNVRSPNHEVEKIEKGYYTIENRQGRKVYIT…	JFT-1	JFT-1_6	Y
Tripedalia maipoensis	scaffold_16	7937027	7942016	+	g4223.t1	Tmai|g4223.t1|scaffold_16_7937027	MKQARMVTIVACVTILSCLASATTSQNDLNSALTNVEKSLKDAPGDSKGAMAALMALKKDLHINSKNVDKAKSILGTVNSALGKLKSKNTAQIISGCLDIVGGIASTFGGPVGMGIGAVASFVSAILGLFTGKAAKTSIASVIDSALKNHRDDALERAGAGAKRDFAESCAFIKTLKAQTDLSKTDLTILAANVPIYKFSQLLGVLESRILRGAVTTDFSEAKRTLDLVLLYSQLAVMRETILIELSLLYRKPGTANYIADAVDNANKVNKDFAKDTLTFLHSLIPENALVGALYYPIEYSDRSQQIMKYATYFGVPAHPRLPHPTNHRFENVYWKNWSMCSEAYMNNYMFRGCPNVKFANMLVDKLPSGHYTIQNMRKRKLYITKHNEGWAWGTLSKD…	JFT-1	JFT-1_7	Y
Tripedalia maipoensis	scaffold_16	7978978	7981448	+	g4224.t2	Tmai|g4224.t2|scaffold_16_7978978	MARYLAHLCIAVALWLSAESAMLQRRTTEEIEGDLDQAVQKVKGDSANAKALKTKLSNLKTELNTKWNTEDNREKLVGVVSAITESIGKLQSDDPIDIATGCLDLLAGLASNLGPLAGIAPLFSVLSMVIGLFGGEKVQESVGDVVKKALKEQRDDELEAEAFGTQREFTVSKAFLDGIRKEPKTLTEMEVASLSANVPIYKGVKFLAILTQRIKKAAPTNAEEAKKVLAFMELLADLCSIRDVIILDLYQLVSSAGHSPNIAAGILEVKNVGRGEFRDALQELFKGNDPKHWILYSSLYPKNRSPQTKKIHKFLKTIGIIDIPKIDDDISGRKIISALAYPEYCMASPSGGQSMQGNYAKNQYKRECTITLRREQDGFYTMRVYQRRIAYASEEYVLL…	JFT-1	JFT-1_8	Y
Tripedalia maipoensis	scaffold_17	1605613	1606983	+	NA	Tmai|scaffold_17_1605613	MKNSKLLIIHIVLLLLIRRLLADLALELKDADKGTAIFKEDPRRLVQTIGTMIPRLKPSLVLLLRYITSEEGSSDTKKVVPLLSILRNVASKLKSCSSLDQALAISELQASFKMNFPGLGARAPAVRKFILSAASLFSGARVRASIMELAKHYLATKTYNSIKRDVLEAGNQLAISFDLLKKSISQNITKNEAKELTDRVDIKHRLGLFSKLSSLILRLRNSTDASDVEQVISCVMLYACVHMLREVVFQMLLELIKDSGYPELNDVVVEELLKRYPITCKTLQFLTSPQLRDAPALSFYYPEGKDQRSKFIQICIQYLKLNTSKVQAAYLSYGTYRMIPVTEVNRSITPHLSKTTLLNDVNLLKLREIIHLDRVSFSKTTDGFWEIRFANFPVNLKGS…	JFT-1	JFT-1_9
Tripedalia maipoensis	scaffold_18	3710308	3711612	+	NA	Tmai|scaffold_18_3710308	MENQLNLLKVSADTFTGVTAVQKKTKVRDGLISLSNAIPNLVSGNLQEFVRGVSDILYGVGMTFGGPYGFALAIFGSMFSSVLGLFTSTKMKESMDNTIDKALSKQYDKELWHKANGFAEVLQSFKTAQDGFRRGLQLNQTPDDLSIYRLAEVNRVEEKEAFLGELWSTIMDKKREAKDPGKTMKFIALYGELCKMHLTNLKDIANLIRTTGKLNFTLFQVEEVSDTLQQTCRSRLEFLRGQDEERDPKNYALMGHFYPTSQSEDFTSLDMFLTGLGMPAMEPFSYNNNSHYLLSPKKYPNHGICCQQWMSLEQWLYKTIIGCSKRQESHVKIYKQFDGHFKIHATRFFTPLYQNTQKFLYSVELCMESEDKLSFSVICQEGGNLFRFAPIVSDRHYFL…	JFT-1	JFT-1_10	Y
Tripedalia maipoensis	scaffold_18	3717670	3718971	-	NA	Tmai|scaffold_18_3717670	LENQLKILKATTDVNTGVTAVQKKTKVRDALVSLNNAIPKLASGDPLQSVRGVTDLISGLGMTFGGPYGFAFAIFGSVFSSVLGLFSPATVQESVGDIIDKALSRQHDRELRNKADAYREVLRSFKTAQDGFRRGLQLNQTPDDLSIYRLADVDRVEGKEAFLGELWSTIMDKKREAKDPGKTMKFIALYGELCKMHLTNLKDIANLIRTTGKLNFTLYQVEAVSDALQQTCRSRLEFLRGQDEERDPKNYALMGHFYPTSQSEDFTSLDMFLTGLGMPAMEPFSYNNNSHYLLSPKKYPNHGICCWWMVRGRDVTYSINGCSQGQRSHVKLYKQQHGYFKIRGTLFHLDGKNFRVTLYTAELCMKSESSLEFNVSCEEDKKLFRFVPIVSDRHYFLIS…	JFT-1	JFT-1_11	Y
Tripedalia maipoensis	scaffold_18	3724398	3725702	+	NA	Tmai|scaffold_18_3724398	MLFKQQRKQILNQLKTIKVAEDTGKGVAAVQQKTKVRDALISLNNAIPKLASGNPLQAVRGVADIFNGVGMTFGGPAGFALAIFGSLFSSVLGLFTPATAQRSIDDIIKNALSDQYDKELRHEADGYREVLLSSKTAQDTFRRGLQRNETPHDAEITALAHVKKVEFGGEFLGKLWSVIKDKRADQSDPGKTMTFIALYGELCMLQLMNLMDIANLINSTGRRNYTVRRVTAEYIRLRQDCRSRLEFLRGLEEKRDPKDYALLGHFYPPSQSEAFTLLDKILTGLGMQQMRSFNFNSVLFSLATKKRPDFGVCFFYYAPKMYAVVKGCKGMNAYTKVIVLTKNDFFSIQPGAFQLLDTNVKYGFLCMNSEKSVKLSTNCEDDQKLFRYVPIVSDGKYFM…	JFT-1	JFT-1_12	Y
Tripedalia maipoensis	scaffold_18	4258755	4257304	-	g4752.t1	Tmai|g4752.t1|scaffold_18_4258755	MKLGGGMVSFFTLFLFIMNSALAARHKRHEIGESRFAALESIIRSNFDALTRNSLERKLPMARYNYESIENDLKDPIRAAIERGQVEDMLGVLVSAVMKLKESDSNTFISGITELVTGISLSMDGPSSYAFRMLNGLISSVFGLYDGRRLKSALRKVIDGTLKDISDEELKDHAEGLVDKYADYKSALDSYRENEGQLKEATVDGFLKSMDVERGNAFHRVLKSRIHPSASSETEARNIYSFIQLFTVLCLLKDSIYIDLYNTVLLSNHLPFIANAIAEYRRGTLESYADVLKFLRLQDNDEYNTSKFRILALFYPEEQSEGSKRVSEFMDLLNIARVPAWSFKSHHKYYLVPEYYPTHTMCNLRPKNAGGDKTTTSVGSCRQSAIDRNVEINRVGKGF…	JFT-1	JFT-1_13
Tripedalia maipoensis	scaffold_18	5913222	5914688	+	g4769.t1	Tmai|g4769.t1|scaffold_18_5913222	MEFEIRVKVFCIVMLLLVVVYGNEEEQLLNVVSKMEGFLSRKLPDQSGITLTRNLKKIEADLRKTAEHESREEGKAADKEIKAVLDKVSDKLDMFTNNDPAVSAAAVSVLLYDIGSRIDQSVGFTPKILREVFSGLLGLLTSDRIARIIESLVKDALGSKPNEELAKKAGYFTEWLHSFKYNLDSFRAHEEQSSTADLSKMALKIEKFNNLPFIDAIKDNIDFRLSDSDDAPKVITLVALLSELGKLIDVCLLDSFNTIVLSGQLPKTAVAVLNTRNDILSGFRDTLQFLRLKSERKRNSTLVLSRFYPPSHSPITKQIDKFLDYLQIPRVSYLPAYSDEMYRLMSGDEKGYQLCGYLRVHVKNVGSIEEENEVEGCSLKAHPNMKSRLVRDEDGFFEI…	JFT-1	JFT-1_14
Tripedalia maipoensis	scaffold_18	7314914	7316386	-	NA	Tmai|scaffold_18_7314914	MALTTWLFLGTLSLLVGQLSVLSVSLDIQSFPTDVRTAFTNVNAQINALPSSAAKDALGQSLLQLSQEAKGKLDSISMKGKVINVLSGINSAIPKFRSKDPKKIASGVADILYGVGLAINGPAGLTLAGLASLTNMVLTLTTPQEIKKSEQVLMMEALKDERFSDLRAKTDGVLVVMSSYKGALDEFRRYLMDNKPVTETDADTIAGENKIFKHLKFMTTVIERAKGDGKDATLSQLAFPLVRLFGKLCTFHLEILTETVALLLQANVLPATQRIMGRSYKDAYDLCKERLQFLRPDDTRETALFSLIANFHPPTRSEENKDLDKILDFLKVQSLPPFLELPAATRILSPTAFPNSVLCAGYLPTQLQTSTVHGCQHTKGDNMRTKITKDKDGFFTIDI…	JFT-1	JFT-1_15	Y
Tripedalia maipoensis	scaffold_18	7324784	7326256	-	NA	Tmai|scaffold_18_7324784	MALTTWLFLGTLSLLVGQLSVLSVSLDIQSFPTDVRTAFTNVNAQINALPSSAAKDALGQSLLQLSQEANGKLDNMIMKARVTEVLNGINSAIPKFRSKDPKKIASGVADILYGVGLAINGPVGLTLAGLASLTNMALTLTTPQEIKKSEQVLMMEALKDERFRDLRAKTDGVLVVMSSYKGALDEFRMYLMDNKPVTETDAKTIAGENKIFKHLKFMTTVIERAKGDGKDATLSQLAFPLVRLFGKLCTFHLEILTETVALLLQANVLPATQRIMGRSYKDAYDLCKERLQFLRPDDTRETALFSLIANFHPPTRSEENKDLDKILDFLKVQSLPPFLELPAATRILSPTAFPNSVLCAGYLPTQLQTSTVHGCQHTKGDNMRTKITKDKDGFFTIDI…	JFT-1	JFT-1_16	Y
Tripedalia maipoensis	scaffold_18	11066879	11065560	-	NA	Tmai|scaffold_18_11066879	MTKAILGYQSDISSNSKAAKELSASAAKKKKVQDALTGITKAIPKLASRDTYQIIGGIGDLIAGFGFAAPGPVGLALGTFGTLLSAVMGLFGPTKVEKSFKDIMLEALQEHEDNELHKKISTVCQTLKNYKAMQDVLRELYMDDPSQVTKDALKRLNTDHKEIVLREFYNFVWERVKETKEGSVEAGKGYRFLRRYVQLMHLHLIVEWDTIELLGKHKDLKANALMLGRLYNLTMEENSRRLAFLRPQSNTDPATQKLSMLACFYPTNQDECSREIDQFLDTLRIPKTSIVSFSPNYAYSTASKKYEGKQICRVYRWPFWDSPVVADAVEGCTANKSFWIKYKEKDGGFWEINVGYLSEKAKQGVRYTRANLCLASDHKNLKTTDDSDCSGGTLFRLVP…	JFT-1	JFT-1_17	Y
Tripedalia maipoensis	scaffold_18	11084755	11086047	-	NA	Tmai|scaffold_18_11084755	TDKTVTAEARKTKVKIALVSINSALPKLQSMSSQELISGLGDLMFGIGSTVHGPFDFILGLSGQMFCAALGLYGSRIIDISLDMAITRAMFYVDDKRIEREAVLFQRLSARGKEARDRFRQALIKSPATIDEPLVQHLIPSIPLLNEGQFLPSFHKRLFCVAISNKDAAGAYALVVLYAQFCEIALLDLLDTFTMLKLYGKAKNHARTLSYNITAVQKACKANLQFLRWQGQINSSLYSILGHFYPPEQNEEAMNLNLVLDILHIKAIPPFTHSADYWYVISPKHYKDYVMCARYVEGWWNSTTTLEDDSVQGCQAKNHQEVWNRLLKVENELYQITIAFMKKELWKKMRLSRAKLCVVGKGKRVKVTHTKDPKTKCHGKDTKFRLVPLSIKGDTFMIA…	JFT-1	JFT-1_18	Y
Morbakka virulenta	scaffold62	1300847	1307949	-	Mvir|scaffold62.g32.t1	Mvir|scaffold62.g32.t1	MNPKLFILFTLILFVMADEDDINAKVIKADSQISNIKTLTGNLVADPFTKRYLPSVGTGIADKLATVTVKWNRAKIKAVEAYNQASEVDADKISGAIEGVGGGFVGFVNGVKNGDWVEGVQGALQIISAAAQLAGPVGMIVSSILSVVSSLFSLFGGGAAVESMDDKMERIVAEQIDIGRRKNLDADVRGLKAAYTAISTSIQHFRDSGKLDENQANELYNHAFTELPIFGKLRARIDEICDDKETGTRDEKNEHSYSCLDVVQQYTDVSIIRQLIITDMASLLVEIYEDKNFNNTNNEVAAGLKAVGNNLLNLVKQEQEADRTFLGFMGDPFNHGTKRNSIALFYQNPYRYPTLKSYIRNLHANIPGGLFREYTMICVDTSLGGFCDILGINDFPNLL…	JFT-2	NA
Morbakka virulenta	scaffold90	939723	946382	-	Mvir|scaffold90.g23.t2	Mvir|scaffold90.g23.t2	MSVCRSIEVGEVASFISVILVLFTGGGAKKLVGAIIDSALKNHGDEGLEAQAAGAKRDFAESSAFIKILKKHEDITKADLTILAANVPIYKFSQMLGTLENRILRGAASTDLGQARKTVDFVLLYYQLVIMRETMLLDLSIXIFNAKLVICLYSIFSQFLGAKRDFAESSAFIKILKKHEDITKADLTILAANVPIYKFSQMLGTLENRILRGAASTDLGQARKTVDFVLLYYQLVIMRETMLLDLSILYRKPGTANHIADAVDNANKVNKQFAKDTLDFLHNLLPEHALVGAVYHPLENSQTSQAILKYVKYFGISPPAAPVRVGYHLFKNIYWKSYSICSESHIGNHMFRGPQGHLIFIPLKSGNYMMSTKKWPHWFLYMESSAHGYIRSWKGNPGP…	JFT-1	NA	Y
Morbakka virulenta	scaffold90	962753	969850	+	Mvir|scaffold90.g24.t1	Mvir|scaffold90.g24.t1	MDIKGVQSCWSLFIVFCCLVVTSSYADQDDIGKALQDMETSLKGVKGDTQMALEALQGLKNDMKKKPDHLGKVVKIAGSVTAALGKLTSKDAKTIVAGCLDIVSGIATTFGGPVGIAVGAVASFISAILGLFTGGGAEKSVGAIIDSALKKHRDERLEAQAAGAKRDFAESSAFIKILKKHEDITKADLTILAANVPIYKFSQMLGTLENRILRGAASTDLGQARKTVDFVLLYCQLVIMRETMLLDLSILYRKPGTANHIADAVDNANKVNKQFAKDTLDFLHNLLPEHALVGAVYHPLENSQTSQAILKYVKYFGISPPAAPIRAGYHLFKNIYWKSYSICSESYMGNHMFRGCYRRMFGNIKVERLSSGHYTMQNRYKRKLYVTKHDQGWAWGTAA…	JFT-1	NA	Y
Morbakka virulenta	scaffold90	976138	986532	-	Mvir|scaffold90.g25.t1	Mvir|scaffold90.g25.t1	MDLHTELGCYFLIILCFATMPSYSVEEAINSNLKRVQNLLESIEQDTKPALKALAKLQSDLKSNPDQERKISSILASIETGLKDFKIENPAQRISGCLKIASCIEYEYQGTGKFGTSIATNLMSSLLILFTGEKAISAINAIIDSALEKYPEEMDFQKEAPKAKRDFKESTSLIKSTKMKAEITEMDITFLSSEIPIFKFGGILLLLENKILHLAPTLDSKKANEALDFILLYSQLVTMRDLIFKDLSLLIRESGKANHIADAVDNANKVNRNLAKDAIGFLHKLLPEQAIIGIMYHPIEHSNRSKSIFTFTRYFNIPDIPRIKFPASYNFQNCYWHDYIMCAKSYLGNYIFLGCAVPKEEPKNIKVNKLISGHYTIEIQERKMYITKHAEGWAWGTLV…	JFT-1	NA	Y
Morbakka virulenta	scaffold90	999010	1012822	-	Mvir|scaffold90.g26.t1	Mvir|scaffold90.g26.t1	MRLDSVILIFGSALLFISQIQSKIQYENDVTSLLSDIRENINGIPGDNQGVLDALDNVEDEVTFKPEMKKNITELLGFIKPAAKKLMSGNGYLIASGCLDILSGIAKAYGGPLGVPIGAVADLVSNILSMVNGKGTRSPSESMIDMALSKYREKSLRMKANGAKREFTESIAFIETLKKSKNITVTKLGILASNVPIYRFSAFLGSLEYFISQGSVTRDLKQANKTIDFILLYAQLVVMRESILTDLCLLYNRGKMYDIGKALSNAIKVNRRFAREHLEFFNKVGPEHVVIASLYYPPGNSHASKYIQTFKQFFGVPDQPPVLPGYYTITNVFWDKWAICSRWWTARIIFQGCRDAKKSNIEIIRLKNGYSLLRSRSKKTLYVSRTDAGWVWGTSDKDP…	JFT-1	NA	Y
Morbakka virulenta	scaffold133	74186	140996	+	Mvir|scaffold133.g4.t1	Mvir|scaffold133.g4.t1	MKISAIEDLIGKVDDQGLKNSLREVRQLVQEPQSGGTTDKLLGVIKSVGTALPKLNSGDGLQIAIGALEIVKSIAEAFPGKGTAIGAVIGLVANILGLFTSTKVVRSTEDIVKEALRENSDAELEGEIEGAKLALSAAMDYLKPKINHNLTLSDASGLASKVHITLALRPIGMVKTRIEQRKYTNKISEGKRAIKFVSLFCQLFTMRTLVYTQMIAIVKKSGHDGEAESLASVRDGQLPKYKETLTFLTEPDESTATTLSFYYPPGKDQTSIYLQTCLKYLDLSSEAPSMEFLVRNKGYTLSSLKWPNYKNTFDPSSEYIRARTHRGSPIYAMRHYFDAQENGYFVIRISIKPIMYLATDGTWVYATKENNGDKNEFLIFKREDNSIIITPKEHLGKFF…	JFT-1	NA	Y
Morbakka virulenta	scaffold133	106772	107680	+	NA	Mvir|scaffold133_106772	SDAELEGEIEGAKLALSAAMDYLKPKINHNLTLSEASGLASKVHITLALRPIGMVKTRIQQRQYTNKISEGKRAIKFVSLFCQLFTMRTLVYTQMIAIVKKSGHDDEAESLASVRDGQLPKYKETLTFLTEPDESTATTLSFYYPPGKDQTSIYLQTCLKYLDLSSEAPSMEFLVKNKGYTLSSLKWPTYKNTFDPSSEYIRAKSHRGSPIYAMRHYFDAQENGYFVIRISIKPIMYLATDGTWVYATKENDGDKNEFLIFKREDNSIIITPKEHLGKFFQVQGHYVGLTEGNPSQQGYFKVQ	JFT-1	NA	Y
Morbakka virulenta	scaffold133	124648	125928	+	NA	Mvir|scaffold133_124648	DADSSNAVSAIEDLIGKVDDQGLKNSLREVRQLVQEPQSGGTTDKLLGVIKSVGTALPKLNSGDGLQIAIGALEIVKSIAEAFPGKGTAIGAVIGLVANILGLFTSTKVVRSTEDIVKEALRENSDAELEGEIEGAKLALSAAMDYLKPKINHNLTLSDASGLASKVHITLALRPIGMVKTRIEQRKYTNKISEGKRAIKFVSLFCQLFTMRTLVYTQMIAIVKKSGHDGEAESLASVRDGQLPKYKETLTFLTEPDESTATTLSFYYPPGKDQTSIYLQTCLKYLDLSSEAPSMEFLVRNKGYTLSSLKWPNYKNTFDPSSEYIRARTHRGSPIYAMRHYFDAQENGYFVIRISIKPIMYLATDGTWVYATKENNGDKNEFLIFKREDNSIIITPKEH…	JFT-1	NA	Y
Morbakka virulenta	scaffold133	194723	196087	+	NA	Mvir|scaffold133_194723	IMKMSSKIACPVIALRVTILLLPFVLCAGANSSDATAALDDLIGKVDDKNLKDSLVEVKELVQQPQSGGTTKKVIGVINAVGPALSKLNSGDGLQIAIGALEIVKSIAEAFPGPGSAIGAVIGLVGSILGLFTSTKVVRSTEDIVKEALRENSDAELEGEIEGAKLALSAAMDYLKPKINHNLTRSEADNLASKVHITLALRPIGMVKTRIEQRQYTNKISEGKRAIKFVSLFCQLFTMRALVYTQMVSIVKKSGHNNEAESLASVRDGQLPKYKKALKFLTEPDESTATTLSFYYPPGKDQTSIYIQTCLKYLDLSTEAPSLKFLANSQGFTLSSLKWPTFKNSFYSFSDYIEVRAHSGAPLYAMRHFFDEQVNGYFVIRISIKPILYLATDGTWVYA…	JFT-1	NA	Y
Morbakka virulenta	scaffold190	60850	62585	-	Mvir|scaffold190.g2.t1	Mvir|scaffold190.g2.t1	METSLKSRSLFQVLIGTILLLIFVSCANADASSATTAIDSLIGKTDDQNLKDHLEKVKTLLNEPTSGENSKKVIGIVNAVGKALPKLNSGDGLQIAIGALEILKPIAEAFPGAGPTVGAIIGLVSSVLGLFSSTKVSRSTDDIVREALNDVSDNELEGEIEGAKLALSTAMDYLKPKINENLTKSEADGLASKIHITLALRPIGMVKTRIERRKASNVAEEGRRAIKFVALFCQLFTMRDLVYRQMISIVKSSGHDGEAKSFTSARDGQLPTYKETLKFLTEPDESTATAISFYYPPGKDRQSKYIQSCLKFLSLSPDSPSLEFMHFERGTALSNLKWPKYYNSIKIDNPYQGYLEVDSPGKSRIYAMRHFFHAEDDKYYVIRMGNKDLKFLTTDGTWL…	JFT-1	NA	Y
Morbakka virulenta	scaffold190	71863	73485	-	Mvir|scaffold190.g3.t1	Mvir|scaffold190.g3.t1	MEFSAKRGILIMGIMQSISFLFILSCVNGSTSHETSVIDDLTDKIEDQNLKESLRQVSTLLQNAEFEKKKKKIIDIVDAVGTALPKLNSEDGLQIAIAALEILKPIAEAFPGAGPAVGAAIGLVSSVLGLFSSTKVSRSTDDIVKEAMNGVSDNELEGEIEGAKLALSAAMDYLKPKLKHKLSLHEADNLASKIQITLALRPIGMVKTRIEQRSGSNTAKEGERAIKFVALFCQLFSMRDLVYRQMIEVLKKNNHISEAEALASVRDGQLPKYKETLQFLTEPEETTATALSFYYPLGRDQRSRYIQSCLKFLDLPTDPPNMNFLKYSSGAILSSLKWPGHFIFPKMDRPYRGYLISSFVKGRPMNGMKHIFRPQNNGYFIIGIHRHYLTTDGTWLFTS…	JFT-1	NA	Y
Morbakka virulenta	scaffold254	2685	10925	-	Mvir|scaffold254.g1.t1	Mvir|scaffold254.g1.t1	MYHGTFLFFMISYICTATVAATDIETTADRAESQIDRVQDMVVLMHKDVFTQHLLGSGGNGISGKLETAKGKWRKAKKSAIDSYNADREGNAERIGGAIEGVGSGLVEFVGGIKNGDWMQGVQGAISIISSIAQLAGPAGMILSSVLSFVSSIFSLFGGSTQSESMDDKIERIVKEQIDIGREKDLQADVEGMKVTYQSLSASIQHFRESKKMEQEQANELYNHAFIELPIFGKLKARVNDICDDKTEKKDSDKCLGVFKLYAEISVIRQLIITDMATLLAEVHENHHPNQSQSEVTEAENGGSGLLLVSNNLLNLIKKEQENDRSFLTFMGDPFNHRQRRYTLDIYFQNPDKFASLKAYIKTLHKSVPGGLFKDYVMICDDKYLKGQCNILTEGEYPN…	JFT-2	NA	Y
Morbakka virulenta	scaffold254	21974	26745	-	Mvir|scaffold254.g2.t1	Mvir|scaffold254.g2.t1	MVVLMHKDVFTQHLLGSGGNGISGKLETAKGKWRKAKKSAIDSYNADREGNAERIGGAIEGVGSGLVDFVGGIKNGDWMHGVQGAISIISSIAQLAGPAGMILSSVLSFVSSIFSLFGGSTQSESMDDKIERIVKEQIDIGREKDLQADVEGMKVTYQSLSASIQHFRESKKMEQEQANELYNHAFIELPIFGKLKARVNDICDDKTEKKDANKCLGVFKLYAEISIIRQLIITDMATLLAEVHENHHPNQSQSEVTEAENGGSGLLLVSNNLLNLIKKEQENDRSFLTFMGDPFNHRQRRYTLDIYFQNPDKFASLKAYIKTLHKSVPGGLFKDYVMICDDKYLKGQCNILPKGEFPNLNDKPGVWNNRILSVYIPLGLELTSWTGQNFAGSRNFGPY…	JFT-2	NA	Y
Morbakka virulenta	scaffold254	112842	117107	+	NA	Mvir|scaffold254_112842	GPAGMILSSVLSFVSSIFSLFGGSTQSESMDDKIERIVKEQIDIGREKDLQADVEGMKVTYQSLSASIQHFRESKKMGQEQANELYNHAFIELPIFGKLKARVNDICDDKTEKKDSDKCLGVFKLYAEISIIRQLIITDMATLLAEVHENHHPNQSQSEVTEAENGGSGLLLVSNNLLNLIKKEQENDRSFLSFMGDPFNHRQRRHTLDIYFQNPDKFASLKAYIKTLHKSVPGGLFKDYVMICDDKYLKGQCNILSQGEYPNLNDKPGVWNNRILSVYIPLGLELTSWTGQNFAGSRNFGPYAGPLALGLIPGEKDWESIKIATTERDAENEVRICRTYSMEPEYCDTVPLGEYDLNNIHGWNWRGKLKSMYIPPGFTIHAHQAPYQTGKQYLYITGP…	JFT-2	NA	Y
Morbakka virulenta	scaffold289	746245	756114	+	Mvir|scaffold289.g22.t1	Mvir|scaffold289.g22.t1	MSSVLLVLLSFIIFVTGDGSIDNKIAKTGDQIESITALTTNMVSDPFTKKLFPSSGAGISGKIESVKQTWKKSKESAKKAYENDKEGVSERISGAIEGMGEGFVGFVNGIRNGDWQEGVQGVLTIVSTIAQLAGPVGMIISSILSVVSSLFSLFGGGAAVESMDDKIQRIVAEQIDIGRRKDLEADVEGFKTAYTALSTSVQHFRDSGMLEEDQANELYNHAFTELPIFGKLKARINDICDDKKDVKDAYQCLDVIQLYTDISILRQLIITDMASLLVAIHEKKHPDDEHNGKGLMVISNNLLNLVKNEQESDRRFLDFMGDPFDNIKRRYIIGIFYQNPDRFSSIKSYINTLHKVVTGGIFKEYVMICNDMNLRGICNSVFKGRYNDLGKNPGAWSDS…	JFT-2	NA
Morbakka virulenta	scaffold319	370706	383934	+	Mvir|scaffold319.g8.t1	Mvir|scaffold319.g8.t1	LLTSNRAQGSLSTVLRDIGNSLKSFKGDTHLAQKALAFLKTELKSKKTQDRRTSPFLHSVKSGLRKISSKDAKQVIAGCLDLVSGIATKFGGPAGIVVGALASFVSAILGLFTNKAKKSVGEIIDSALKKHYDNVLQGQASGAKRDFAESAAFINALKRQPDITKADLGILAANVPIYKFSQILGTLENRILQGAAATDLSSAKRTIDIILLYSQLVVMRETLLVDLAILYRRPGTADHIAIAVEASNNENRKFAKDALDFLHNLLPEHAIVGAIYHPIENSETSKQILSYLKHFGVPDPPSSFQSSGHLFKNLYWKPWSICVESYLQNYIFRGCPKRLPHYVNVIKLSTGHYTMELSKRTLYITKHEEGWAWGTLSKDPGPQGHMIFIPLKSGNYMIS…	JFT-1	NA	Y
Morbakka virulenta	scaffold319	389106	395145	+	Mvir|scaffold319.g9.t1	Mvir|scaffold319.g9.t1	MVPTTSHAKGIGSLLKKIESKLKNLPIDTKSTLAAVKAVKEEQGKDDHKEDVSNFLEKVDSALEKFGTGDALALAAGCLDIVSGIAMAFGGPVGLGIGAVASLVSSIIGLFTEDSGQESIGDIIDSALRKYGDDELQRQATGAKRDFAESSAFISIIKKQKKLSDSDLTIIAANVPIYKFSKMLGTLENRILKGSVTSELEEAKRIVEFVLLYSQLVVMRETMLLDLSILYRKSGSANHIADAVDNANKVNKNFAKDTLTFLHNMLPEHVIIGAVYYPIKNSKTSQSIFAYAKYFGVSDPPNILTPKAYFFQNIYWSNYYICSEAYMGNHMFRGCKNLKKKNIFVNRLESGYYTMANKYRRKLYITKHAEGWGWGTLDKDPGPQGHLNFIPLKSGTYMI…	JFT-1	NA	Y
Morbakka virulenta	scaffold319	396166	408679	+	Mvir|scaffold319.g10.t1	Mvir|scaffold319.g10.t1	MKMKVCYFGLHLLIIYCMLLSGSHAKGLSIGSLLQKIKRTLKQLPTDTKSVLETLKGAAGDFQSKDKKEENGKLLEHVHAALEKLGTGDAMNIAAGCLKVVSGIASSFGGPVGLGIGAVASFISSILGLFTDAGKESIGDIIDSALKKYGDEQLRRQAAGAKRDFVESSAFISAIKKRKKLSESDLSIIAANVPIYKFSKLLGTLESRILKGSVTNKLKEAKKTVDFILLYSQLVVMRETILLDLSILYRKSGTTNHIADAVDNANRANKNFAKKTLFFLHNLLPEHIMVGAVYHPIENSKTSQSILKYAKYFGVNDVSKSVKLGMHRFQNLYWKKWYICSSSFMGNYMFKGCKNLKDLNIRVGRQTRGYYTMENHYARKLYVTKHAEGWAWGTSEKDP…	JFT-1	NA	Y
Morbakka virulenta	scaffold319	432149	454426	+	Mvir|scaffold319.g11.t1	Mvir|scaffold319.g11.t1	MEQKGMLLFCFYFFIFGCLLTTGNAKSRSISSVIQGVKDALKRVKGDTRGVLASLKDLKSNLNDNTDQEEETGELLEKVGAALTKLGSGEAVDVISGCLDVVSGIASAFGGPIGLGIGAVASFISSIIGLFSGAGQKSVGEVIDTALKEFGDVNLQRQASGAKRDFAESTAFIKVIKMQKNLTDSDLSVIASNVPFYKFSTLLGALENRIEKGAYTTSMTEAQRVVDLILLYSQLVVMREAMLIDLSILYRKSGNANHIADAVDNANQVNKEFAKNTLKFLHNMLPEQVLLGASYYPIENSKRSQSILSYIRYFGVKTTMESIKPGNYKIVNEYWKEYSICSDPYMDTYIFHGCFEIDYNNIRLQKLKSGHYTMKNTRKRKAYVTKHAEGWVWGTLDND…	JFT-1	NA	Y
Morbakka virulenta	scaffold319	464699	471663	+	Mvir|scaffold319.g12.t1	Mvir|scaffold319.g12.t1	MNLKCLRWFAFYALISSVLLTEIRARKNIASVVQKVQSTLKGVRGNTKGVLTSLSKLKDDLVKNPDRAEKAGELLEKVDSALGKFNEGKAIEIVSGCLDIVAGIASAFGGPIGLGIGAVASFISSILSLFTGEASESVGEIIDSALRKHGDNVLHRDASGAKRDFRESAAFINIVKKKVKPTELDLSVIAANVPIYKFSAMLGTLESRILQGAATSDLTHAERTVDFILLYCQLVVMRETLLLDLVMIYRRSGVATHIADAVADANRVNKKIAKESLTFLHNLHPQQAVLGAVYHPIQNSKRSQAILAYSKYFGVPPPPKSLDGRYYRFQNVYWPSWSICTEAYMGNYMFRGCPNIGFANLLLKKYDGGYYTLQNRKKRKLYITKHKEGWGWGTIKNDP…	JFT-1	NA	Y
Morbakka virulenta	scaffold323	999405	1001889	-	Mvir|scaffold323.g23.t1	Mvir|scaffold323.g23.t1	MQELLEKVRVASERRGLYLNVDKTKVMVVGDAINSNIICNGIQIHVVEEFNFLGSMISNQGGNSKEIRRRLAMARSTVTTLTKIWKDRGISTVTKTRLMKSLVFSIALYGCESWSLKVSDIQKINAFELWCWRRLLRIPWTAKKTNEFVLNSIGNPDSLTNEVQRRKLCYFGHISRRDGSNLEKLIMQGKVEGSRRRGRPPRRWIDGVKSIMNMNWQELNNACQDREKWRKLVREVTKGLSKLFELTSAIFGLFTEAKLERSMENVMKDALQQHHAKELEHEAAGTKKLFDISKVFLDGVRQDSSPLTGSEISALSANFPISTGVKFIGTLGSYLTQLSPKGKSETQQAVKLIEAYCQLCSLRLILLADLFTTVSAAGNSPHIANGIKGVITITEREFK…	JFT-1	NA	Y
Morbakka virulenta	scaffold323	1028658	1031529	-	Mvir|scaffold323.g25.t1	Mvir|scaffold323.g25.t1	MFQTVTSGLIFFLLFVNLVSSTDTDSQTTPAKVIDDLDSKLDESSPEEKEVKSKLRKLKDSLQTYASNKANQNNVIKVVGKISASIGKIKSNDPATAITGYLNIITDITSLVPGLQGISKLFELASAVFGLFTEQKLGNSVEHTIQNALRAHHGKELEHEAAGTKKLFEISKVFLDGVRQDSSPLTGSEISALSANFPISTGVKFIGTLGNYLTQLSPNGKSQTQQAVKLIEAYCQLCSLRVILLADLFTAVSAAGNSPHIANGIKGVLAITEKEFRKPLLSVIKNDDPKLFPLLAELYPKENHQLIFDTLKILNISDFPGYENNYQGNWYFLNSYGPRYLKATVFYRLMTRSCLMGGTTHKTSVELKKRPNGYYRLILQSHITGYISDSTGYCTEGPD…	JFT-1	NA	Y
Morbakka virulenta	scaffold414	428844	431794	-	Mvir|scaffold414.g10.t1	Mvir|scaffold414.g10.t1	MAKLLIFYLVCFLCKAIIVSATEEDDSIAVELGKLKETITDLPDGKEKNILLKAFDSTEQEKVGRVKEMSQKIKVKDMLAAINGVIPKFRSNKTEDILAGCGDLLLGISMAVGGPYGMAFSVVASMFSAVMGMISPKKVEKSMASIIEDALKKQRDSELKDEAHGIKTLFRNYKAAQDRFRISLFNANDTVTDSDILALAPHDKIYEPTKFTGILSRRINTATEKNAESTLEFVILSAQICKLHLSILIDVKTLIDLSGRMKATANMVGGVIEQSKTECRENIDFLRLENMDQSYYRLLGFYYPPKQSQRTMEVERMLNTLQVPPVTPFFFKAKFRYVISPEAYKGTVLCAASFVSFDNYGVLKELNEIQGCPGQTNKKLWNRISPVENGFYEIQIATR…	JFT-1	NA	Y
Morbakka virulenta	scaffold414	445001	446714	-	Mvir|scaffold414.g12.t1	Mvir|scaffold414.g12.t1	MAKLLIFVFLCLLCNNVLVSAAPEDDLIAAELEKIKVTINGMPAGKEKDLLLKGFGTTSLDTNNKVTGIVQKTKVKDMLASINNAMPKFQSGEPTKILSGCGDVLFGIALSVGGPYGLAFAAVASLFSAVMNMISPQKVEKSLESIIEEALKKQRDSELKDEAHGITTLFRNYKAAQDRFRISLFNANDTVTDSDILALAPHDKIYEPTKFTGILSRRINTATEKNAESTLEFVILSAQLCKLHLSILIDVKTLIDLSGRMPATASMVGGVIEQSKIDCRDNIDFLRLENMDGSFYRLLGFYYPPKQSPRTEEVDRFLDILQVPPIVPFEFTENYRYVLSPETYQGIVMCGVVVDDFSLDNVGIMETKRTIEGCNGENNEHVRNMISPVENGYFEITVG…	JFT-1	NA	Y
Morbakka virulenta	scaffold503	3587	5515	-	Mvir|scaffold503.g1.t1	Mvir|scaffold503.g1.t1	MIAEALKEDNDEELRREAFGTQKMFKISKAFLDGVRKDKRPLTESEVSSLSANFPIYKGVKFMAILGKYISENNPKSDAEATRAVKLIEAYCKLCGTRMILLSDLLSVISAAEHSPHIAEGIQQVILESREEFKVPLKDIMTGAEKEKYGILMALYPKQQNPLIFSFFKAVNIPDIPRFQDDYSGSYTFRNWHYSKYYLKQLESSYMGVMSCVVGSKKTPGTVVLKKNKTTGFYKVKFNSDYWGYKGKNDIKFSCEKEDRLKTKDDEDLAFYLLPVQDGNDKFFLLKFRQQSFKYLYLSAGNEIKETAYETSTTKVRWIVAKSNGTVL	JFT-1	NA
Morbakka virulenta	scaffold512	292043	304625	-	Mvir|scaffold512.g7.t1	Mvir|scaffold512.g7.t1	MSARLIIFTLTLTFVYQTTNADEDETSLFVLNKEIKTQMDLLRMNIKRLKNGRTKDYFVSGLKAFRRDLENLKLSAITDKHVTSEAKKSKIKIALMSLNSAIPKFNSRKKDIFGGIGDLLYGIGSTFGSEYNFVLGISGKMFGAVLSLYSAPDVGDSMRKAINQTLLMEKSEKLMQEITGFQEKVIPAKVGRDRFREALMSNEFIDQNLVRNFLNSTYVPREKYLFQEIEKAIGNVGKKEWEVRRAFRLLLLYGNLCEHFLIDLLDTYNLLLLYGKSKSSAKKISQKIMFVRKSCKKNLKFLRLEGKTPKNKFGLLGRFYPQEQNPDTMNLDLILDILSIPAIPKPTYSPHFFYELSPTKYKGYVICARYIEGWWGGTTTVDDNSVGGCNTTNHQEFLN…	JFT-1	NA
Morbakka virulenta	scaffold663	16533	18125	-	Mvir|scaffold663.g1.t1	Mvir|scaffold663.g1.t1	MASGKVYTFIFYLVLSFKQSSCTPHNALINMEYDKLKTKIDMLPDTKERTLLKKGLVQSIQDVNEKATESEKMIKVEEMLVAINSAILKLQSEEGSQILSAVGELLFGISSLFGGPYGIAFESTASVLVASMGMLSPEKIETCMNGVIQNVEKEALDEKLTKAIKKMLCSHKETHDRFREKIFDPKETVTSSNIKQMEATSHINEQKKFVAMLSKRIQGITMTNGNKTMQVVFLLAEFCKLQIFNLIDLKTLIDLSGQKTETTPMVGGYIEEFKSLCREAIDFLRLDSMEIKFFGILGYYYPPEQNFKTLGVKATLDILHVPAILIYNFLAPQSILLQTKGFPNYVICAVTRYLSKKEVSDFAMKIEGCLAGTKPEYFVNVVPASSGFFKINIRHVIYR…	JFT-1	NA
Morbakka virulenta	scaffold673	87566	92191	+	Mvir|scaffold673.g3.t1	Mvir|scaffold673.g3.t1	MASTKFCLVLFFLFLIIQDPVYGRRRNSQRRKKSKPTIDSTMRKVKDDTPAGKKLKSQLASLKDKANSEENQESVDAGLSAVSDSVEGLQSQDPAKIALACLEIISAVAGAFDQLGAIGMVLGLVSTLISMFSGGEVQESMEDCIKRALKEQRDDELEAEAYGTKRIFTVSKAFLDGIRETEIPLSTQEVAALSANVPIYQGVKFIAMLVQRIGNAEPKDENGAKRVLTFMELLVDLCSVRDVLLMDMYRVVASAKHSPSIAAGIKGVQQLGRKEFRKTFQKLLLGNNPKHWVLLSYLYPRDRSTQTIKIHTFLEYLEVDDLPRIDVDLSGQQIISSLKYPNHCIAAQSDTEELRGDYWKEEQGKNCKATLTQTNDGFYTISFPEVGNANAYATEAYAK…	JFT-1	NA
Morbakka virulenta	scaffold674	95846	98130	+	Mvir|scaffold674.g4.t1	Mvir|scaffold674.g4.t1	MDMFMRKNFHGKEGNDLKTSFKSMQDELRKATEFELTETGVIKLEKVNEVLNHIKNKLKMFTSSDPTVSAAALSVLLYDIGPFVSEFVGFNHIVLRHIYSGLFGLLKPSQITGVVNGLVRDAIGSNSKDFIHRKAQSFSKWLRSFKIELDQIRGKEKTISISFLSKMSLKLEEFRKIDFISSLEGVILHNVGEKKRASHTITLIALFTELGKLMDVFILDAFNTITLSERLPKTAVAILNTRNEILSDFKDVLELLRLQNNSNSANTFILSYFYPPAQSSITKQINKFLDYLQIPPITFLPNNPDKKYMIINKKYNTSICGFHYLHVRNIGAIKEENDIRGCKLKQKAKSRLIIDDQGFYEILASMNSKMNQLVAIVTSANGHDLELNFGIEESFNADL…	JFT-1	NA
Morbakka virulenta	scaffold2219	466	2758	-	Mvir|scaffold2219.g1.t1	Mvir|scaffold2219.g1.t1	AKREFTESIAFVETLKKSKTITVTQLGILASNVPIYRASAFLGALEYHISHGAVANDVKEANKTVDIMLLYSELIVMREALLTDLCILYKRGNQDDIALAISNTIKINRKYADQHLKFLNDVSPDNAVIASLYYPVKHSFASEAIGAYKHFFGATEEYSTVWSGYYTISNVYYKGWSICNKGIKAIFRSCKKPHEQKIQIIPMKDGYSKLRSKSNFYLFVTATSEGWVWGTKSEDPGTL	JFT-1	NA
Morbakka virulenta	scaffold3072	1	1615	-	Mvir|scaffold3072.g1.t1	Mvir|scaffold3072.g1.t1	MDLKGVQSCRSLFIVFCCLLVTSGYADQNDISKALQDMETSLKGVKGDTQMALEALQGLKNDMKKKPDHLGKVVKIAGSVTAALGKLTSKDAKTIVAGCLDIVSGIATTFGGPVGIAVGAVASFISAILGLFTGGGAKNSVGAIIDSALKKHRDERLEAQAAGAKRDFAESSAFLQILKKHKDMSKTDLTILAANVPIYKFSQMLGTLE	JFT-1	NA

## Sheet: 8
Type	Scaffold	Start	End	Strand	Gene model ID	Seq	Remarks	Reference Sequence from
FRamide	scaffold_6	2312559	2318277	-	g9373.t1	MNKPSMVLQRALWFTFFAVTLTCKVATADAEESTKSETYENWTTDEEIENQVPVSQNTPCQGEVCLYGNRQLARRKLLKRKTVCGQGGCLLNPEAKSIDHELDAAEMDTYGIQYNQLPRDSSCQGQMCWFRGKREKFTASNIQERLLAQLSFLRELNKKEMNVNNGKRAQGELGCTGQMCWFRGKKEYDESQDQSSCVGQMCWFRGKRTLNTKGSKSCTGQMCWFRGKRNMLTKDGALKKELNEQKRCTGQMCWFRGGRSLDEKGVDGKAARQKGKRSKKEDMCTGQMCWFRGGRSLDEKGVNGVAANQNGKRTQKETMCTGQMCWFRGRKELQAHQMGCKGQMCWFRGKRNAKHEIKN		QBL07845.1
VWamide	scaffold_2	49631731	49632402	-	g5906.t1	MMKAPSYKIGLVVLMLQLIVSLHVTCATDMNEESATSPVKRARSEEEVQEDAVVKALERGIFARRDVISQPPGVWGRSSERSFRARAFNRDRHLFRPQSPAERRALQDSIEHLLQAKEALDVLNKRASQPPGVWGKRVAAQPPGVWGKRTVRTQPPGVWGKRTVRTQPPGVWGKRALEFMEREYALGQVESKDEDTIAARSASVSQPPGVWGRRSIERSHSEEQ		QBL07848.1
RFamide	scaffold_1	65484347	65485519	-	g1334.t1	MELNTKALVLAFLAIAIVCATAADTKLAQQSRRQEEEDSQLFLSEEDDLVDERSVNKAKRIIEQWLRGRFGKRDLRGRFGREADSGDTVTENKARETLSQWLRGRFGREASDQWLRGRFGREATAQWLRGRFGREAMDQWLRGRFGREVADQWLRGRFGREVNSQWLRGRFGREVATQWLNGRFGREVADQWLRGRFGRQVEEDIEDELFDRELDQWLRGRFGRGTEQWLNGRFGKRESNEQWLRGRFGREMDQWLRGRFGREAEQWLRGRFGREMEQWLRGRFGREVEQWLRGRFGREAEQWLRGRFGRESNESEDKVEQWLRGRFGRNLEQGHLGVENSQGNGMEPNVARAVKTEDRSATVGVKDQRQDSSQVEAELSGQGSISDKRNL		QBL07849.1
LWamide	scaffold_5	43187471	43188136	+	g9177.t1	MWASYYAAPFLGLIFMLAIASAAPREDTEDQSASKRDASDKEQMGYKANTVRETLIKGYPNRPSVLWGRDVVAKDNLKNTEISEGLQPGMWGKRSLSQPRLNMLWGRAVVENPNMGLWGREKEMFERPKVGLWGRSSSPGKLGLWGRQLQESGYQPRDRPLGGLWGKEIRARDVENNQGSSDELERELENKIISLFSQLKSAKERREATEKRKPGVVGIWGK		QBL07850.1
RAamide	scaffold_5	48805063	48806376	+	g9270.t1	MSGIYFFLLLGIGTYFLCQSFAKGECNTDSTEYAYKRSDCLEDLLGLEPTEFADFLEEQPRSGKRELSVQDYRPRAGREGDQDYRPRAGRQTLTRPRGGREYSARPRAGREYTIKIISSEMQGFDRPRAGRESAARPRAGRENIQRPRAGRESLNRPRAGRENLERPRAGRENLERPRAGREYEGRPRAGREYEGRPRAGREYEGRPRAGREYEGRPRAGRQMLGRPRAGREFLERPRAGRNVVLVLNDGDNEGSNKRSFYIRSKVHAESQQDVSRTQEEEKGGELLDERESDHVVDAMDEEAANFMNENQPRSGKRELSGKAALALRLKREGEAIRSAMGKISGSTFAASSALEDEMNNQPRSGKRSILLGKHGIGSLQAGKKDSTDMKRGLNFPVEE…		QBL07851.1
QKamide	scaffold_17	941708	958817	+	g4378.t1	MAVISFAAFTTLIGVFHVVHTVPLPKDTRGILPDVSETYHEPDELAMVLE	fragment	QBL07852.1
RY-precursor	scaffold_7	1767459	1807736	-	g10227.t1	MAKRLIFSAFLAIFICLVEAKAWKRESNHHFAKGSKDPQWPRYKKSESNHDPQWPRYRKSELEHKDQWPRYKKSQERNSPQWPRYKKSEALQWPRYKKSEIFASEQWPRYKKSEVKHSPQWPRYKKSELRKSPQWPRYKKEASKSAHWPRYKKSEAIRPAQWPRYKKSEASKSAHWPRYKKSEASRPAQWPRYKKSEAESEAQWPRYRK		QBL07853.1
RYamide	scaffold_1	65796378	65797205	-	g1341.t1	MVKIYIFALFCVAYVQSAVISTYIVRDVNPRDLHNHDMIFTDDSSSQGVKKREATLMKANTNTWNRMAFKHQRERRDTPPWVKGRYGRGVFHQNLRQLREGAVKVPREDYEKKVMAFLLNNRLAREADKFHGQLYARQMWHHQRYGREGKNGRNQGAPISPFVDEEKRITDEEKNILKGSFDKRERAAPGWHHGRYGRRVYGYYQGSMKRETPVWAKGRYGKREKEQDKHDLTQRYRKEDDEQDVEEIYDEGEMEHSEDGLAENSQLYRLSQRANH		QBL07846.1
RRFamide	scaffold_13	17449293	17450444	-	g3266.t1	MSAIIKLYQSQDLFQSIRCLHLKMNQQTQAFLLLVTLCIVFQNGCSLENSQLEEVSYRVSTDANADFLLCRDMFITSAVKRLAHSRMRDEWTVENSDYQKKRRGRFGKRTLGNGNWKQESPQHFHDNSGKLEKIARQIIAFCQFKILDSDERELDAFKRDRHDFRHDEAEEKKSSLSQSSRKSSEKFLEGDDPIWLPLATAMMTENDRELGAYNIQESKEEDDAYDMIDQHLAAFDSMAKKETAGMKPNRRRFGKKEVISAGSNTKPTRRRFGKEVSRGSTNLSQRSTNEEKSREAVIGETSLPQEKPRKRISKRASKTDYQRRRFGKREKNESYRMFTNVPHNRRFGKREDSENYLMVADLPQNRRFGKREDGDEYLGNEYYGKILGDNRKEQD		QBL07847.1

## Sheet: 9
ID	Seq	Annotation	Genome location
g10466.t1	MALSGLQTYGKGTLMLDDDGFPTNTTKEQMQVEKSVLFNYESYLESFGGVESSTIRIPLLKHKHVTYLKKGLTHLSESYECLDASRPWLCYWILQGLSLLDEPIPEEIASGVADFLGRCQDPDGGFGGGPGQLAHLAPTYAAVCALCILGKDYPEAYNVINREKLQQFLDSRRTEDGGFTMHKDGEVDIRGAYCAVVAARLTNVYTHDLFRGTADWLATCQTYEGGFGGCPGMEAHGGYSFCGFASLALLGQEDKADMRRLLRWTSRRQMRFEGGFQGRTNKLVDGCYSFWQGGLYPIIHNILAMYNDDDISQENWMFDHVALQEYVLINCQSPGGGLVDKPGKSRDFYHTCYCLSGLSIAQNFASDSREITHSVGGEANILKPTHPAYNIVTDIAFAA…	protein farnesyltransferase subunit beta	id=scaffold_7&stop=17517665&start=17517552&stop=17509244&start=17509176&stop=17505973&start=17505812&stop=17501827&start=17501645&stop=17498504&start=17498454&stop=17497054&start=17496914&stop=17493377&start=17493282&stop=17490737&start=17490645&stop=17488997&start=17488938&stop=17487580&start=17487488&stop=17486642&start=17486592&stop=17484806&start=17484675&stop=17483829&start=17483758&stop=174…
g11173.t1	MPSHGHKEERDPSEWDEQRWPTDVGIIGIEIYFPMYYVDQDELEDHDQVSKGKYTIGLGQKAMGFTGDREDVNSFCLTVVQKLMDKYNVRPSEIGRIDVGTETLLDKSKSVKTVLMQLFEESGNTEIEGIDSTNACYGGTSALFNAVNWIESSSWDGRLALAVMGDIAVYAAGNARSTGGAGAIALLIGPNAPLVIDRGLKGTHMQHSYDFYKPDMVSEYPVVDGKLTIKCYLTALDRCYERYRTKFERRIGSFSLSELDFFVFHTPFCKMVQKSVARCYFNDYLHCEADCGSAAESLTKYRDCTLEETIHDEKLMKDVERASVQASMEVFMSKTKPSLLVAEQVGNMYTPSLYGSLASLLVCEEEKNLLGKRVGLFSYGSGLAASIFSLTICPNQKSL…	hydroxymethylglutaryl-CoA synthase	id=scaffold_8&start=19032562&stop=19033035&start=19035973&stop=19036101&start=19038865&stop=19039179&start=19039758&stop=19039964&start=19041086&stop=19041481
g1418.t1	MIFFSPQIAVMDFDGLVRIIALHPFETVLGYVGGCLLLASPKQRVVNGSFVRLSSNNEDSSAKSYAAESLCYYGLVYLVVILHLVVHIQRLVKKSVRPLVLIGFLFIYCAFVTVLFISAILCFVGDKECILRFGIPTLILLMDWNRTGKAINKVLNSLFTSKVTTKDVGESVEKYSAASFSEGLIESLLVAFGISSGIPQVAFLSSLGCLAIGASVLSILFLLPALLSIYVEVKNSRASKDDSQLDNNSPNLDYKLVFTKEHQRLSMNPLAFMVQMMMCGLLLTIHILSWLSGGQSSHGANESSKQSGMTSSLQLSVEQLFVAALILNLALKFVLMEIRESIQTTGVAGLRRLRQISKNFTHVEPEKVAQAEDSNAPSKPVSKLDLETLPLMTDMEIIE…	3-hydroxy-3-methylglutaryl-coenzyme A reductase	id=scaffold_10&start=886624&stop=886812&start=893789&stop=893914&start=895592&stop=895849&start=899121&stop=899222&start=903702&stop=903827&start=906483&stop=906596&start=908442&stop=908606&start=911165&stop=911287&start=915949&stop=916173&start=918814&stop=918930&start=922105&stop=922191&start=923687&stop=923863&start=924321&stop=924425&start=925899&stop=926009&start=928020&stop=928184&start=928…
g2003.t1	MFPHLLLRQLKLCGGLLSLGLGFVYLQSQQDKQTDSRFESILKHAYERKPLRVAIIGSGIGGTSAAHFTRELLGSSVRIDVFEKNNVTGGRAAVVEVDGKEFEAGGAVIHESNRYMDNFAKLGELTKIRGEDLGNTILGLYDGDEIFFTDSKVEVCLIVQIVLEIWI*	prenylcysteine oxidase 1	id=scaffold_11&start=1068430&stop=1068864&start=1077513&stop=1077644
g2004.t1	MSWATAVTLCNYGQGMDVNAFVGMVSLAGAQDLKLWIVKGGNYQICHHILQLAKANVFLNRRVGKIKKVSDEDGNPLYEIYMADGELFGSYHSVIVASPLEVPDTNLSCEGCRQWLKADSRQRYQSTVATFVHGNVNPKKFGYDRVEDVPENIFATTESGLFFRTIGMVMSTQGEKYDKKKLKRPAYYKVFSEERLTDRQLSELFSDIHAVKVVPWLAYPRYSPPEQFLPFVLDEGVFYTNAIERAASAMEMSAISGRNAALLCKKFLDGCHASKSPGTFYSTVSPGKGEL*	prenylcysteine oxidase 1	id=scaffold_11&start=1077843&stop=1077911&start=1079694&stop=1080500
g3136.t1	MADLQIRYLHVGFSNRYQILSVLECLILAFLYVGSLYVKRSKLPRDHPTTIKQRFCRVLIVSLIAPIFVWLWSDHSTPYSEEEKYHLCRWLGIHTHQLLLAIIYPLLLTMILFTGPLVLDIVTSSCVFSSPFSGGFFSSILHTVQDLTWQRTVVVAPFTEEFVFRACMLPLLVPVLGRYQSILLCPLFFGLAHIHHAIEGISSGESPKHVWIRVLFQMSYTTVFGAYTAFLFLRTGHLAGPVITHSFCNFMGFPEFDKVSECNYPGLIWITFVFGLVLFALLLFPMTDPALFQSIYWQE*	CAAX prenyl protease 2	id=scaffold_13&stop=8162565&start=8162431&stop=8156894&start=8156706&stop=8155524&start=8155240&stop=8153716&start=8153642&stop=8152700&start=8152554&stop=8150143&start=8150036&stop=8144739&start=8144668&stop=8143217&start=8143143&stop=8141889&start=8141677&stop=8139532&start=8139434
g3140.t1	MEEVNRASESKFEKYRKRFDSCLSKLIDDVTLADLNNVELSDAAKWVRAMIEYNLKGGKRNRGLMVVVCLDHLKKGQLSEEDISKALILGWCVEWLQSFFLVADDIMDESAMRRGQPCWYKNSEVGLIAINDAFLLESCVYRLLRLYFLREDYYIDIVNCFHEVTHQTALGQELDLLTSQTTKKVDLDKYTDARYKSIVKYKTAFYSFYLPVALAMYMAGIKDSDCFHDARQLLLELGAYFQIQDDYLDCFGDPTTTGKVGTDIQDGKCSWLVVKALELADEKQRQILDEYYGKKDTAAIERVKQVYKDLNIAGKFKEYEDESYKRISSMIEQHANSLPDEMFMELMDKIYKRNK*	farnesyl pyrophosphate synthase	id=scaffold_13&stop=8270684&start=8269620
g5031.t1	MWKKFEVSAPGKIILFGEHAVVYGKEALACAINLRSYCTVEVEDYNGDSVLQISAADMDLCCSISRDIVSSLSQGFATEGELPVITNNGLMQVKSLAEEEIDTMKALTYVLFLSLYLLIGSKDASKKSVKVSLSSQLPIGAGLGSSASYATCIATGFLLAFNKLSVSSDSLLLTDGDRTTINHYVFESEKIVHGSPSGVDNTICVHGGALSFKGGDITYGLRLPPVMVLVVDTKVSRSTKHMVAGVKERHGKHTKLYELIFDTIQEVTTEGKHSLLRMAQGNLSEEEVIDCYSCLQDYIKLNGNLLRCIGVSHPAIERVTEICQEYGLSSKLTGAGGGGCSFALVPPVYSECKLDELRKALDGCGYVSWIASIGDQGVLIEAT*	Mevalonate kinase	id=scaffold_2&start=6516861&stop=6516935&start=6519765&stop=6519926&start=6521704&stop=6521904&start=6525539&stop=6525781&start=6526531&stop=6526578&start=6527571&stop=6527663&start=6528969&stop=6529103&start=6530983&stop=6531075&start=6531965&stop=6532129&start=6533216&stop=6533323
g5084.t1	MYQSDDVIILDACRTPIGSFKGSLSTLKAHELGGAVIKELVRRNGLQPDNVSEVIYGQVLTAGQGQNPVRQAAVKGNLPYSVPAMSVNMVCGSGLKAVALGYQAIKNQDSAIVIAGGQESMSQAEHSMHCRGDLKFGDAVLKDTMMSDGLIDAFHLYHMGITAENVAQKWEVCREEQDQFALESQHKCEEACLKGNFSNEIIAIKVESRKGITEVTKDEHPRCGSSLTALQRLRPAFLHDGRGTVTAGNSSGLNDGAAGVVLMTYAHALKLGAKEPLARIVSWAQVGVDPSVMGIAPITAIKKALAKASWTIDEVDLFEINEAFASQSVAILKDLKIDKNKVNVSGGAIALGHPIGASGARILVTLLHGMKRLNKRRGVASLCTGGGMGVAMCVERF*	Acetyl-CoA acetyltransferase, cytosolic	id=scaffold_2&start=9180469&stop=9180678&start=9187360&stop=9187548&start=9189921&stop=9190037&start=9196131&stop=9196277&start=9198049&stop=9198336&start=9198766&stop=9198885&start=9204033&stop=9204203
g5407.t1	MADSIFVATLSFMWIMFLWELYLGYRQFKIYKTTTQVPVELKDEIDEESFEKSRAYQVDKSKFGFFSAVYSQLESTIILVLNGIPFLWAVSGSTIAYFGLTSEYEISQALVFMVYGLLFSTVTSLPWSLYSTFVIEQKHGFNKQTLGFYFKDLVKKMVVMIAIAMPSTAAILYIIKIGGDLFFVYAWLFCLTLSLFLMTIYHDYIAPLFDRFMPLPDGPLRSSIEALAARIEFPLTKILVVEGSKRSSHSNAYFFGFHKNKRIVLFDTLLMESPFEKEKEKEKEKEEEKKEADQMEGSVPTENTEDHEENLGEGDEAAKVSVEYKSRKDDQGDNSESGQVTASASGDKKKKSGCSDEEILAVLGHELGHWKLGHVLKNLIIGQANVFLSFFLFGLLMNM…	CAAX prenyl protease 1 homolog	id=scaffold_2&start=25259763&stop=25259879&start=25260597&stop=25260749&start=25261987&stop=25262115&start=25265229&stop=25265396&start=25272926&stop=25273102&start=25274636&stop=25275127&start=25275740&stop=25275877&start=25280720&stop=25280884&start=25281818&stop=25282060
g7599.t1	MPTDKNASASSVTCLAPINIAVIKYWGKRDEELNLPLHSSLSLTLNIKELSSKTTITASSELEDDELWLNGQKVEVVPPRLKRVIDEVRRQCYKRRREESDKFWVAGVKLKISSENNFPTAAGLASSASGYAAVAYGLCKLFDLKGDVSLIARLGSGSACRSTLGGFVRWDKGECTYGADSLARQIASEEHWPNLHVLILVVNDQRKEVGSTDGMKRSYNTSELLQYRADYIIPDRIKKMEKAILDRNFDVFAELTMKDSNQFHAVCQDTYPPIEPPYLAPVSHDIIQLVTELNQVSGKNIAAYTFDAGPNAFVFTLEEHLRSVIATISAVFLPLDSAIDGRRNQSGYFRGLPFPDDETFAVNAVTTKIAARRKSRGAVDTVKYVIHTKSGSGPKLLEQ…	diphosphomevalonate decarboxylase	id=scaffold_4&stop=17075320&start=17075246&stop=17072844&start=17072770&stop=17071348&start=17071265&stop=17066165&start=17066118&stop=17064282&start=17064133&stop=17060876&start=17060814&stop=17057909&start=17057802&stop=17056010&start=17055957&stop=17047418&start=17047329&stop=17044225&start=17044091&stop=17042126&start=17041992&stop=17037770&start=17037648&stop=17037372&start=17037289&stop=170…
g7844.t1	MMSVYPPSCCKVILILSGKRKSGKDYIAGLISKRLGEENCELLHLSFPLKKQYADEHNIDFEKLLDSSSFKERYRRDMIQWGERKREQDAGVFCRAVVNQGISSGKPIWIVTDARRKSDLSFFQDKPVMTVRINASEETRRKRSWNFVHGIDDVESECDLDDYEPWTFKIWNDGRDSQLENDMASICRAIAAMAGFDLKRE*	phosphomevalonate kinase	id=scaffold_4&stop=30258179&start=30258078&stop=30225190&start=30225125&stop=30221607&start=30221164
g8121.t1	MTGKAKAFSNLCMEGKIALIAFLSTIVLLNIQLYLLMYSNLDRVLHVPLIICDLLLLIFSPQGPVVRRSALLGAAFGGALWTTFFSTQYRLFGLYMTFLSFFHFSEYIVTAIYKPDSLKISSFLLNHSFEYQVAAVASWTEFFIELYLFPAFKTFNFVSCTGLVLVVFGESMRKLAMITAGSNFHHIVQTRKAKGHQLVTSGIYSLVRHPSYSGWFCWSVGTQILLCNPICLIGYAVASWQFFDDRIKEEEHFLIQFFGEDYVTYMLKVPTGVPFNTGLEKEVKGFIKSG*	protein-S-isoprenylcysteine O-methyltransferase	id=scaffold_4&start=44095230&stop=44095901&start=44101564&stop=44101791
g8579.t1	MSSSEGEEDEEWTPYSEREDWRDVQPIPQDDGPHPVVAIAYSDRFKDVYDYFRAILKADERSQRALDLTEDAITLNAANYTVWHFRRVILKELKKDLKAELEYIGEIIRSQPKNYQVWYHRGVIIENAGDPSDELEFTAEMLNRDGKNYHAWQHRQWVLEKFNLWEDEVEFTWKMIDRDVRNNSAWNQRYYAIKKTTGFTSEVIDREIKYTMSMIEKAPQNESAWNFLKGMLTSNQGKLTNYPGLFDQIKSMYESKVDSPYLISYMVDYFEEKLEANPSDAKSLQEALKLCALLSSEVDCIRREYWNYFERTLQSRFGSK*	protein farnesyltransferase/geranylgeranyltransferase type-1	id=scaffold_5&start=11895975&stop=11896112&start=11896745&stop=11896858&start=11900953&stop=11901075&start=11902839&stop=11903111&start=11905683&stop=11905748&start=11907010&stop=11907189&start=11907851&stop=11908012
g9950.t1	MACLKRARFLLLSVQSSKSCEILLERTFRLQSRSTSTQWHYEAHQLKQLNDKCILVDELDSVVGVATKKDCHWLGDKKLSRLHRAFSVFIFNGKKELLLQQRAESKITFPDYFTNSCCSHPRYSDEEMVTEGRLGIKRAAVRRLNYELGIPSSQISISDLKFITRVHYAAPADGCWGEHEIDYVLFLQKDLDLNINKEEVKSVRFVDVDGLQEVMNKAYRKELKVTPWFTFIAEKLLPSWWQNLDKVDMFVQNTVIHRGPLVEST*	isopentenyl-diphosphate delta-isomerase	id=scaffold_6&stop=31391081&start=31390614&stop=31384287&start=31383952
g2256.t1	MEALPEYSKVVEELRECFLSGVTLPYEFRISQLKALKRLVTENDTFLQDAVYKDLCKPPKETELTEFTVLVGDLIEAIDDLQEWMDFEVKPSDLLNKGATCALKYDPIGVTLIIGPWNYPVALTLQPLVGAIAAGCCVIVKPSEVAPHTAEAIGKLFPKYLDQKCYHWIQGGIPVATALLRERYDMVFYTGSTVVGKIVMEAAAKHLTPVVLELGGKSPCFIHDDSDMDVVANRVSWGKFVNAGQTCIAPDYILCTEKVQEKFIASMKKSIKEFYGENPEESKDFARIVNSRHFQRVQKLIDPNKVVIGGKQDPEKNFIEPTVLANVDPGDPVMQEEIFGPVLPILTVKSVDDVIQFINVREKPLSLYVFANDQKIIKKLLDRTSSGGVCVNDTVVHAG…	aldehyde dehydrogenase, dimeric NADP-preferring/aldehyde dehydrogenase family 3 member A2	id=scaffold_11&stop=13932366&start=13932220&stop=13930980&start=13930882&stop=13927167&start=13926964&stop=13926287&start=13926195&stop=13924666&start=13924463&stop=13921519&start=13921427&stop=13919382&start=13919284&stop=13917345&start=13917280&stop=13915233&start=13915093&stop=13914311&start=13914237&stop=13912142&start=13912026&stop=13911532&start=13911272&stop=13909797&start=13909651&stop=13…
Fragment	DGSIPVMQEEIFEPVRPILTVKSVDDVIQFINVR	aldehyde dehydrogenase family 3 member B1	id=scaffold_7&stop=13922904&start=13922803

[truncated: 6 more sheets: 10, 11, 12, 13, 14, 15]
